# Supplementary material for: Reaction dynamics of the 4-methylphenyl radical (C6H4CH3; p-tolyl) with isoprene (C5H8) – formation of dimethyldihydronaphthalenes
Source: Royal Society of Chemistry journal article supplement (doi:10.1039/c4cp01056f), 2014-01-01
Supplement: c4cp01056f1.pdf [file c4cp01056f1.pdf]

### Supporting Information for CP-ART-03-2014-001056

Cartesian coordinates of reaction intermediates, transition states, and products (in Å).

#### C<sub>7</sub>H<sub>7</sub>, p-tolyl

|   |   |           |           |           |
|---|---|-----------|-----------|-----------|
| 6 | 0 | -0.004839 | 0.842257  | 0.000000  |
| 6 | 0 | -0.007297 | 0.129292  | 1.204618  |
| 6 | 0 | -0.007297 | 0.129292  | -1.204618 |
| 6 | 0 | -0.007297 | -1.271651 | 1.219533  |
| 6 | 0 | -0.007297 | -1.271651 | -1.219533 |
| 6 | 0 | -0.006003 | -1.904417 | 0.000000  |
| 6 | 0 | 0.027506  | 2.352855  | 0.000000  |
| 1 | 0 | 1.056779  | 2.728012  | 0.000000  |
| 1 | 0 | -0.467084 | 2.765801  | -0.882388 |
| 1 | 0 | -0.467084 | 2.765801  | 0.882388  |
| 1 | 0 | -0.012380 | -1.817084 | 2.157994  |
| 1 | 0 | -0.012380 | -1.817084 | -2.157994 |
| 1 | 0 | -0.011347 | 0.669345  | 2.148265  |
| 1 | 0 | -0.011347 | 0.669345  | -2.148265 |

#### C<sub>5</sub>H<sub>8</sub>, isoprene

|   |   |           |           |           |
|---|---|-----------|-----------|-----------|
| 6 | 0 | -1.583159 | -0.912342 | 0.000003  |
| 6 | 0 | -0.515323 | -0.101212 | -0.000008 |
| 6 | 0 | -0.664444 | 1.399450  | 0.000000  |
| 6 | 0 | 0.834876  | -0.675677 | -0.000005 |
| 6 | 0 | 1.983193  | 0.008670  | 0.000002  |
| 1 | 0 | -1.472073 | -1.991394 | 0.000025  |
| 1 | 0 | -2.595167 | -0.523796 | -0.000013 |
| 1 | 0 | -0.187481 | 1.842680  | -0.880078 |
| 1 | 0 | -0.187868 | 1.842623  | 0.880320  |
| 1 | 0 | -1.716157 | 1.689078  | -0.000221 |
| 1 | 0 | 0.875392  | -1.762702 | -0.000004 |
| 1 | 0 | 2.938783  | -0.502096 | 0.000007  |
| 1 | 0 | 2.013715  | 1.092277  | 0.000005  |

#### i0

|   |   |          |           |           |
|---|---|----------|-----------|-----------|
| 6 | 0 | 3.549853 | 0.883812  | 0.397207  |
| 6 | 0 | 3.565226 | -0.460088 | 0.006035  |
| 6 | 0 | 2.388795 | -1.031208 | -0.493514 |
| 6 | 0 | 1.207858 | -0.285126 | -0.601714 |
| 6 | 0 | 1.267572 | 1.025458  | -0.194202 |
| 6 | 0 | 2.383572 | 1.654541  | 0.301179  |
| 6 | 0 | 4.822435 | -1.287351 | 0.145092  |
| 1 | 0 | 4.457348 | 1.341300  | 0.780233  |
| 1 | 0 | 2.388565 | -2.071156 | -0.806718 |
| 1 | 0 | 0.299239 | -0.730460 | -0.991208 |
| 1 | 0 | 2.379676 | 2.696062  | 0.602905  |

|   |   |           |           |           |
|---|---|-----------|-----------|-----------|
| 1 | 0 | 4.875354  | -2.063832 | -0.621443 |
| 1 | 0 | 4.860012  | -1.786329 | 1.119570  |
| 1 | 0 | 5.718329  | -0.668243 | 0.060259  |
| 6 | 0 | -2.642276 | 0.973919  | -1.081019 |
| 6 | 0 | -3.289808 | 0.294978  | -0.121867 |
| 6 | 0 | -4.569510 | -0.354567 | -0.427905 |
| 6 | 0 | -5.321901 | -1.056223 | 0.425761  |
| 6 | 0 | -2.735048 | 0.184333  | 1.276254  |
| 1 | 0 | -3.046694 | 1.054105  | -2.084634 |
| 1 | 0 | -1.696163 | 1.468052  | -0.890735 |
| 1 | 0 | -4.915109 | -0.237080 | -1.452715 |
| 1 | 0 | -6.258008 | -1.501880 | 0.110785  |
| 1 | 0 | -5.036014 | -1.210245 | 1.460005  |
| 1 | 0 | -3.423068 | 0.621251  | 2.007371  |
| 1 | 0 | -1.775695 | 0.696353  | 1.358313  |
| 1 | 0 | -2.588387 | -0.862766 | 1.560166  |

**il**

|   |   |           |           |           |
|---|---|-----------|-----------|-----------|
| 6 | 0 | -2.713152 | 1.013290  | -0.328955 |
| 6 | 0 | -3.068124 | -0.295806 | 0.001305  |
| 6 | 0 | -2.048160 | -1.164268 | 0.408112  |
| 6 | 0 | -0.726153 | -0.739979 | 0.476711  |
| 6 | 0 | -0.372240 | 0.573404  | 0.146477  |
| 6 | 0 | -1.387785 | 1.440121  | -0.258884 |
| 6 | 0 | 1.073000  | 1.035170  | 0.241514  |
| 6 | 0 | 2.015736  | 0.225148  | -0.599469 |
| 6 | 0 | 3.281557  | -0.233069 | -0.224081 |
| 6 | 0 | 4.059228  | -0.954221 | -1.113426 |
| 6 | 0 | -4.497790 | -0.770812 | -0.101193 |
| 6 | 0 | 3.826569  | 0.058419  | 1.162106  |
| 1 | 0 | -3.481850 | 1.711687  | -0.645120 |
| 1 | 0 | -2.294201 | -2.187375 | 0.675993  |
| 1 | 0 | 0.044873  | -1.436809 | 0.789853  |
| 1 | 0 | -1.143045 | 2.465176  | -0.519804 |
| 1 | 0 | 1.389864  | 1.021771  | 1.289370  |
| 1 | 0 | 1.117105  | 2.090034  | -0.067513 |
| 1 | 0 | 1.677965  | -0.002312 | -1.607270 |
| 1 | 0 | 5.042536  | -1.317746 | -0.842233 |
| 1 | 0 | 3.702680  | -1.177608 | -2.112390 |
| 1 | 0 | -4.672509 | -1.296268 | -1.046622 |
| 1 | 0 | -5.199630 | 0.064871  | -0.056308 |
| 1 | 0 | -4.746400 | -1.464655 | 0.705989  |
| 1 | 0 | 4.814493  | -0.385607 | 1.292958  |
| 1 | 0 | 3.174353  | -0.343784 | 1.943148  |
| 1 | 0 | 3.917645  | 1.134245  | 1.338640  |

**i2**

|   |   |           |           |           |
|---|---|-----------|-----------|-----------|
| 6 | 0 | -0.712393 | -0.734603 | -0.546145 |
| 6 | 0 | -2.008710 | -1.189723 | -0.341420 |
| 6 | 0 | -3.019392 | -0.326266 | 0.101747  |
| 6 | 0 | -2.680368 | 1.007646  | 0.329628  |
| 6 | 0 | -1.379547 | 1.466895  | 0.120717  |
| 6 | 0 | -0.375632 | 0.606331  | -0.321622 |
| 6 | 0 | 1.047071  | 1.093819  | -0.546917 |
| 6 | 0 | 2.024023  | 0.490658  | 0.420192  |
| 6 | 0 | 3.213588  | -0.178070 | 0.112621  |
| 6 | 0 | 3.667659  | -0.398210 | -1.174517 |
| 6 | 0 | -4.425810 | -0.831096 | 0.318810  |
| 6 | 0 | 4.057457  | -0.667921 | 1.278473  |
| 1 | 0 | 0.053128  | -1.426424 | -0.882896 |
| 1 | 0 | -2.242753 | -2.233753 | -0.527443 |
| 1 | 0 | -3.441351 | 1.700925  | 0.674146  |
| 1 | 0 | -1.146976 | 2.511601  | 0.302982  |
| 1 | 0 | 1.060054  | 2.186919  | -0.440744 |
| 1 | 0 | 1.344026  | 0.886492  | -1.578111 |
| 1 | 0 | 1.760984  | 0.593889  | 1.469965  |
| 1 | 0 | 4.595951  | -0.926898 | -1.352037 |
| 1 | 0 | 3.126244  | -0.058313 | -2.047677 |
| 1 | 0 | -5.074498 | -0.044657 | 0.709733  |
| 1 | 0 | -4.444286 | -1.663909 | 1.028549  |
| 1 | 0 | -4.866596 | -1.193257 | -0.615566 |
| 1 | 0 | 4.796864  | -1.402605 | 0.954580  |
| 1 | 0 | 3.436065  | -1.129934 | 2.049706  |
| 1 | 0 | 4.595456  | 0.163167  | 1.745406  |

**i3**

|   |   |           |           |           |
|---|---|-----------|-----------|-----------|
| 6 | 0 | -0.011750 | 1.075334  | 0.185136  |
| 6 | 0 | -0.037676 | -0.356940 | 0.646078  |
| 6 | 0 | 1.069806  | -1.160912 | -0.098887 |
| 6 | 0 | 2.399055  | -0.439396 | -0.135735 |
| 6 | 0 | 2.486709  | 0.876340  | 0.075188  |
| 6 | 0 | 1.305802  | 1.779537  | 0.341283  |
| 6 | 0 | -1.124917 | 1.658722  | -0.351349 |
| 6 | 0 | -2.352144 | 0.969805  | -0.463689 |
| 6 | 0 | -2.472136 | -0.379214 | -0.015057 |
| 6 | 0 | -1.384818 | -1.006169 | 0.516832  |
| 6 | 0 | 3.605816  | -1.288775 | -0.436280 |
| 6 | 0 | -3.805238 | -1.078273 | -0.140068 |
| 1 | 0 | 0.266076  | -0.375458 | 1.709859  |
| 1 | 0 | 0.734211  | -1.372462 | -1.122452 |
| 1 | 0 | 1.192098  | -2.137067 | 0.386876  |
| 1 | 0 | 3.463214  | 1.354831  | 0.053203  |

|   |   |           |           |           |
|---|---|-----------|-----------|-----------|
| 1 | 0 | 1.395880  | 2.185391  | 1.363579  |
| 1 | 0 | 1.346770  | 2.652822  | -0.320441 |
| 1 | 0 | -1.067626 | 2.686502  | -0.700594 |
| 1 | 0 | -3.212897 | 1.469497  | -0.893749 |
| 1 | 0 | -1.469466 | -2.033355 | 0.861824  |
| 1 | 0 | 4.518195  | -0.690788 | -0.486377 |
| 1 | 0 | 3.488559  | -1.811126 | -1.393249 |
| 1 | 0 | 3.744412  | -2.062821 | 0.327814  |
| 1 | 0 | -3.758466 | -2.099508 | 0.242878  |
| 1 | 0 | -4.129159 | -1.123113 | -1.184974 |
| 1 | 0 | -4.582853 | -0.543705 | 0.415102  |

**i4**

|   |   |           |           |           |
|---|---|-----------|-----------|-----------|
| 6 | 0 | -0.688287 | -0.677433 | -1.113441 |
| 6 | 0 | -2.055674 | -0.842874 | -0.914113 |
| 6 | 0 | -2.739022 | -0.102724 | 0.055495  |
| 6 | 0 | -2.000158 | 0.804304  | 0.820824  |
| 6 | 0 | -0.632248 | 0.971295  | 0.621577  |
| 6 | 0 | 0.048527  | 0.231213  | -0.349325 |
| 6 | 0 | 1.989429  | 1.823019  | -0.509188 |
| 6 | 0 | 1.554254  | 0.386747  | -0.576486 |
| 6 | 0 | 2.424707  | -0.500970 | 0.316266  |
| 6 | 0 | 1.962006  | -1.162445 | 1.376351  |
| 6 | 0 | -4.228777 | -0.255045 | 0.247391  |
| 6 | 0 | 3.872431  | -0.583911 | -0.102302 |
| 1 | 0 | -0.183890 | -1.268306 | -1.871907 |
| 1 | 0 | -2.600487 | -1.557722 | -1.523206 |
| 1 | 0 | -2.501629 | 1.390974  | 1.584522  |
| 1 | 0 | -0.087010 | 1.685500  | 1.228794  |
| 1 | 0 | 2.503518  | 2.214418  | 0.360080  |
| 1 | 0 | 1.668926  | 2.520087  | -1.274118 |
| 1 | 0 | 1.732485  | 0.047875  | -1.609467 |
| 1 | 0 | 2.623091  | -1.773832 | 1.981583  |
| 1 | 0 | 0.921210  | -1.123978 | 1.671795  |
| 1 | 0 | -4.522487 | -0.038540 | 1.277216  |
| 1 | 0 | -4.560557 | -1.267959 | 0.007148  |
| 1 | 0 | -4.782368 | 0.432678  | -0.401643 |
| 1 | 0 | 4.450992  | -1.206752 | 0.582116  |
| 1 | 0 | 4.334802  | 0.407664  | -0.142014 |
| 1 | 0 | 3.960278  | -1.009166 | -1.109198 |

**i5**

|   |   |          |           |           |
|---|---|----------|-----------|-----------|
| 6 | 0 | 2.458378 | -0.530182 | -0.000595 |
| 6 | 0 | 2.561003 | 0.894374  | -0.012283 |
| 6 | 0 | 1.402309 | 1.705430  | -0.049930 |
| 6 | 0 | 0.168268 | 1.151194  | -0.218012 |

|   |   |           |           |           |
|---|---|-----------|-----------|-----------|
| 6 | 0 | 0.001523  | -0.332814 | -0.457780 |
| 6 | 0 | 1.238619  | -1.124044 | -0.152457 |
| 6 | 0 | -1.184323 | 1.778805  | 0.022804  |
| 6 | 0 | -2.028018 | 0.621804  | 0.582639  |
| 6 | 0 | -1.291458 | -0.683185 | 0.312125  |
| 6 | 0 | -2.606734 | -0.397442 | -0.368057 |
| 6 | 0 | 3.711666  | -1.348009 | 0.208451  |
| 6 | 0 | -3.849868 | -1.169900 | 0.017180  |
| 1 | 0 | 3.534740  | 1.356119  | 0.108707  |
| 1 | 0 | 1.499620  | 2.773164  | 0.127002  |
| 1 | 0 | -0.213692 | -0.485564 | -1.536191 |
| 1 | 0 | 1.154293  | -2.206946 | -0.138035 |
| 1 | 0 | -1.623943 | 2.178427  | -0.902136 |
| 1 | 0 | -1.121827 | 2.611769  | 0.727941  |
| 1 | 0 | -2.539405 | 0.774900  | 1.526740  |
| 1 | 0 | -1.246166 | -1.463655 | 1.063950  |
| 1 | 0 | -2.540497 | -0.148280 | -1.426507 |
| 1 | 0 | 4.436981  | -1.164220 | -0.591029 |
| 1 | 0 | 3.492318  | -2.417338 | 0.223397  |
| 1 | 0 | 4.201088  | -1.088687 | 1.152736  |
| 1 | 0 | -3.904497 | -2.124069 | -0.516248 |
| 1 | 0 | -4.757262 | -0.602973 | -0.213838 |
| 1 | 0 | -3.859933 | -1.388839 | 1.088998  |

**i6**

|   |   |           |           |           |
|---|---|-----------|-----------|-----------|
| 6 | 0 | 2.495340  | 1.035678  | 0.002494  |
| 6 | 0 | 2.865034  | -0.301514 | 0.147802  |
| 6 | 0 | 1.884112  | -1.276797 | -0.075572 |
| 6 | 0 | 0.587585  | -0.925715 | -0.429581 |
| 6 | 0 | 0.218973  | 0.417253  | -0.578121 |
| 6 | 0 | 1.193608  | 1.389252  | -0.354583 |
| 6 | 0 | -1.201665 | 0.792261  | -0.979734 |
| 6 | 0 | -2.263108 | 0.328465  | -0.010076 |
| 6 | 0 | -3.234222 | -0.585911 | -0.419325 |
| 6 | 0 | -4.286607 | -1.092669 | 0.317035  |
| 6 | 0 | 4.271739  | -0.694639 | 0.530375  |
| 6 | 0 | -2.228496 | 0.935327  | 1.361484  |
| 1 | 0 | 3.232182  | 1.815055  | 0.169889  |
| 1 | 0 | 2.141846  | -2.326467 | 0.029862  |
| 1 | 0 | -0.153238 | -1.702595 | -0.589071 |
| 1 | 0 | 0.936698  | 2.438638  | -0.462231 |
| 1 | 0 | -1.415533 | 0.383186  | -1.972791 |
| 1 | 0 | -1.251403 | 1.885268  | -1.077671 |
| 1 | 0 | -3.150995 | -0.934642 | -1.447693 |
| 1 | 0 | -4.975456 | -1.801631 | -0.124135 |
| 1 | 0 | -4.468366 | -0.810000 | 1.346280  |

|   |   |           |           |           |
|---|---|-----------|-----------|-----------|
| 1 | 0 | 4.282578  | -1.288115 | 1.449861  |
| 1 | 0 | 4.899935  | 0.183538  | 0.692441  |
| 1 | 0 | 4.740892  | -1.301061 | -0.250926 |
| 1 | 0 | -2.871458 | 0.414281  | 2.070934  |
| 1 | 0 | -2.551217 | 1.985227  | 1.329183  |
| 1 | 0 | -1.210221 | 0.933369  | 1.762880  |

**i7**

|   |   |           |           |           |
|---|---|-----------|-----------|-----------|
| 6 | 0 | -0.455354 | -0.939624 | 0.022265  |
| 6 | 0 | -1.778209 | -1.199712 | 0.358208  |
| 6 | 0 | -2.784751 | -0.250838 | 0.136198  |
| 6 | 0 | -2.413986 | 0.966268  | -0.435816 |
| 6 | 0 | -1.086429 | 1.228473  | -0.775672 |
| 6 | 0 | -0.086296 | 0.281441  | -0.556237 |
| 6 | 0 | 1.362039  | 0.554339  | -0.942555 |
| 6 | 0 | 2.324585  | 0.467415  | 0.217155  |
| 6 | 0 | 3.250851  | -0.566314 | 0.359305  |
| 6 | 0 | 3.451295  | -1.652207 | -0.470307 |
| 6 | 0 | -4.217426 | -0.541377 | 0.514337  |
| 6 | 0 | 2.239093  | 1.566542  | 1.234814  |
| 1 | 0 | 0.303724  | -1.691048 | 0.212592  |
| 1 | 0 | -2.036214 | -2.157022 | 0.801395  |
| 1 | 0 | -3.170452 | 1.722721  | -0.620171 |
| 1 | 0 | -0.829339 | 2.183935  | -1.222532 |
| 1 | 0 | 1.418801  | 1.560775  | -1.375346 |
| 1 | 0 | 1.659613  | -0.135607 | -1.736385 |
| 1 | 0 | 3.892048  | -0.505316 | 1.237420  |
| 1 | 0 | 4.216039  | -2.383612 | -0.242636 |
| 1 | 0 | 2.867888  | -1.819026 | -1.367217 |
| 1 | 0 | -4.883411 | 0.263981  | 0.198074  |
| 1 | 0 | -4.326336 | -0.657528 | 1.597609  |
| 1 | 0 | -4.570275 | -1.468801 | 0.053171  |
| 1 | 0 | 2.936867  | 1.412986  | 2.060451  |
| 1 | 0 | 1.227965  | 1.644761  | 1.652108  |
| 1 | 0 | 2.460610  | 2.542358  | 0.781294  |

**i8**

|   |   |           |           |           |
|---|---|-----------|-----------|-----------|
| 6 | 0 | 0.163878  | 0.749389  | 0.218094  |
| 6 | 0 | -0.204241 | -0.672064 | 0.545875  |
| 6 | 0 | 0.653985  | -1.637488 | -0.327323 |
| 6 | 0 | 2.102306  | -1.228663 | -0.371749 |
| 6 | 0 | 2.556407  | -0.014361 | -0.051270 |
| 6 | 0 | 1.616066  | 1.096822  | 0.378631  |
| 6 | 0 | -0.782314 | 1.636439  | -0.212532 |
| 6 | 0 | -2.143837 | 1.281523  | -0.330441 |
| 6 | 0 | -2.583336 | -0.034577 | 0.001149  |

|   |   |           |           |           |
|---|---|-----------|-----------|-----------|
| 6 | 0 | -1.672502 | -0.956910 | 0.423141  |
| 6 | 0 | 4.017771  | 0.342677  | -0.090930 |
| 6 | 0 | -4.050561 | -0.371348 | -0.123010 |
| 1 | 0 | 0.113525  | -0.873343 | 1.586264  |
| 1 | 0 | 0.236386  | -1.666691 | -1.342027 |
| 1 | 0 | 0.563048  | -2.656257 | 0.067605  |
| 1 | 0 | 2.813169  | -1.987707 | -0.691473 |
| 1 | 0 | 1.832690  | 1.338546  | 1.433689  |
| 1 | 0 | 1.848834  | 2.011274  | -0.180512 |
| 1 | 0 | -0.481532 | 2.649011  | -0.469106 |
| 1 | 0 | -2.863910 | 2.015989  | -0.673356 |
| 1 | 0 | -2.000064 | -1.961394 | 0.678124  |
| 1 | 0 | 4.363078  | 0.696541  | 0.887940  |
| 1 | 0 | 4.206445  | 1.155657  | -0.802129 |
| 1 | 0 | 4.633604  | -0.511430 | -0.379730 |
| 1 | 0 | -4.248905 | -1.405342 | 0.165507  |
| 1 | 0 | -4.399562 | -0.233739 | -1.151581 |
| 1 | 0 | -4.658539 | 0.280257  | 0.512966  |

**i9**

|   |   |           |           |           |
|---|---|-----------|-----------|-----------|
| 6 | 0 | -0.477920 | 1.133180  | -0.526400 |
| 6 | 0 | -1.868432 | 1.042540  | -0.610591 |
| 6 | 0 | -2.565937 | -0.003129 | -0.007639 |
| 6 | 0 | -1.818697 | -0.965711 | 0.682371  |
| 6 | 0 | -0.435612 | -0.875745 | 0.767650  |
| 6 | 0 | 0.267752  | 0.179435  | 0.167822  |
| 6 | 0 | 2.215267  | -0.050340 | 1.705686  |
| 6 | 0 | 1.798475  | 0.222577  | 0.282694  |
| 6 | 0 | 2.466812  | -0.809154 | -0.624679 |
| 6 | 0 | 1.895611  | -1.569459 | -1.552366 |
| 6 | 0 | -4.071283 | -0.092746 | -0.077324 |
| 6 | 0 | 2.380939  | 1.613942  | -0.116433 |
| 1 | 0 | 0.014142  | 1.965428  | -1.012990 |
| 1 | 0 | -2.415897 | 1.804696  | -1.156407 |
| 1 | 0 | -2.328434 | -1.797470 | 1.159514  |
| 1 | 0 | 0.116888  | -1.638438 | 1.305334  |
| 1 | 0 | 3.197869  | -0.456225 | 1.917653  |
| 1 | 0 | 1.629704  | 0.340052  | 2.528950  |
| 1 | 0 | 3.544300  | -0.880818 | -0.478220 |
| 1 | 0 | 2.488794  | -2.251403 | -2.151701 |
| 1 | 0 | 0.829645  | -1.543928 | -1.745861 |
| 1 | 0 | -4.397833 | -1.094557 | -0.370739 |
| 1 | 0 | -4.479532 | 0.618748  | -0.798035 |
| 1 | 0 | -4.525489 | 0.123338  | 0.895573  |
| 1 | 0 | 3.463732  | 1.613777  | 0.026614  |
| 1 | 0 | 1.955770  | 2.406599  | 0.503788  |

|   |   |          |          |           |
|---|---|----------|----------|-----------|
| 1 | 0 | 2.184487 | 1.837847 | -1.168219 |
|---|---|----------|----------|-----------|

**i10**

|   |   |           |           |           |
|---|---|-----------|-----------|-----------|
| 6 | 0 | 2.450117  | -0.262526 | 0.116902  |
| 6 | 0 | 2.280255  | 1.147988  | -0.030322 |
| 6 | 0 | 1.000106  | 1.704279  | -0.261784 |
| 6 | 0 | -0.077472 | 0.902031  | -0.494918 |
| 6 | 0 | 0.072534  | -0.598439 | -0.602662 |
| 6 | 0 | 1.391781  | -1.098666 | -0.093484 |
| 6 | 0 | -1.541594 | 1.260869  | -0.442175 |
| 6 | 0 | -2.212364 | 0.006355  | 0.163398  |
| 6 | 0 | -1.212849 | -1.135102 | 0.062550  |
| 6 | 0 | -2.465571 | -1.143827 | -0.781354 |
| 6 | 0 | 3.803269  | -0.793375 | 0.529715  |
| 6 | 0 | -3.102044 | 0.196772  | 1.370577  |
| 1 | 0 | 3.127286  | 1.803849  | 0.138081  |
| 1 | 0 | 0.870029  | 2.780160  | -0.181616 |
| 1 | 0 | 0.023130  | -0.876968 | -1.676246 |
| 1 | 0 | 1.513532  | -2.171813 | 0.022831  |
| 1 | 0 | -1.952047 | 1.485213  | -1.436529 |
| 1 | 0 | -1.716267 | 2.144530  | 0.178128  |
| 1 | 0 | -1.112848 | -1.855261 | 0.867331  |
| 1 | 0 | -2.359135 | -0.978092 | -1.849912 |
| 1 | 0 | -3.251873 | -1.843059 | -0.516013 |
| 1 | 0 | 4.564169  | -0.549913 | -0.219192 |
| 1 | 0 | 3.786244  | -1.878259 | 0.650277  |
| 1 | 0 | 4.130529  | -0.351682 | 1.476365  |
| 1 | 0 | -3.437550 | -0.765426 | 1.767484  |
| 1 | 0 | -3.994578 | 0.780439  | 1.119473  |
| 1 | 0 | -2.571807 | 0.722446  | 2.171669  |

**p1**

|   |   |           |           |           |
|---|---|-----------|-----------|-----------|
| 6 | 0 | -2.612365 | 1.175695  | -0.000004 |
| 6 | 0 | -3.192788 | -0.093424 | -0.000001 |
| 6 | 0 | -2.332783 | -1.201531 | 0.000003  |
| 6 | 0 | -0.955399 | -1.048779 | 0.000005  |
| 6 | 0 | -0.365413 | 0.228891  | 0.000001  |
| 6 | 0 | -1.229764 | 1.333649  | -0.000003 |
| 6 | 0 | 1.081515  | 0.457010  | 0.000002  |
| 6 | 0 | 2.054699  | -0.473679 | -0.000002 |
| 6 | 0 | 3.491011  | -0.207068 | -0.000001 |
| 6 | 0 | 4.360345  | -1.231582 | -0.000006 |
| 6 | 0 | -4.690142 | -0.278331 | 0.000000  |
| 6 | 0 | 3.974275  | 1.222993  | 0.000005  |
| 1 | 0 | -3.249148 | 2.054597  | -0.000008 |
| 1 | 0 | -2.755169 | -2.201893 | 0.000006  |



|   |   |           |           |           |
|---|---|-----------|-----------|-----------|
| 1 | 0 | -0.330287 | -1.934042 | 0.000009  |
| 1 | 0 | -0.807785 | 2.333700  | -0.000006 |
| 1 | 0 | 1.369137  | 1.504989  | 0.000005  |
| 1 | 0 | 1.785779  | -1.526738 | -0.000007 |
| 1 | 0 | 5.431981  | -1.069773 | -0.000005 |
| 1 | 0 | 4.019669  | -2.261375 | -0.000010 |
| 1 | 0 | -5.021117 | -0.838061 | -0.880621 |
| 1 | 0 | -5.209621 | 0.681862  | -0.000023 |
| 1 | 0 | -5.021121 | -0.838021 | 0.880645  |
| 1 | 0 | 5.064188  | 1.265770  | 0.000005  |
| 1 | 0 | 3.612175  | 1.762962  | 0.880759  |
| 1 | 0 | 3.612175  | 1.762969  | -0.880743 |

**p2**

|   |   |           |           |           |
|---|---|-----------|-----------|-----------|
| 6 | 0 | 1.276386  | 1.326541  | 0.294092  |
| 6 | 0 | 2.653172  | 1.123782  | 0.302083  |
| 6 | 0 | 3.199383  | -0.126529 | 0.008121  |
| 6 | 0 | 2.312242  | -1.167820 | -0.301516 |
| 6 | 0 | 0.940407  | -0.969905 | -0.311867 |
| 6 | 0 | 0.385219  | 0.285810  | -0.004866 |
| 6 | 0 | -1.055732 | 0.551988  | 0.012934  |
| 6 | 0 | -2.051326 | -0.348271 | -0.059015 |
| 6 | 0 | -3.489519 | -0.035606 | -0.055920 |
| 6 | 0 | -3.993461 | 1.074193  | -0.612537 |
| 6 | 0 | 4.689915  | -0.360181 | 0.019846  |
| 6 | 0 | -4.379539 | -1.066919 | 0.598833  |
| 1 | 0 | 0.880421  | 2.309751  | 0.527552  |
| 1 | 0 | 3.312560  | 1.952448  | 0.539689  |
| 1 | 0 | 2.708699  | -2.148622 | -0.546344 |
| 1 | 0 | 0.291630  | -1.797206 | -0.575460 |
| 1 | 0 | -1.326142 | 1.599639  | 0.124203  |
| 1 | 0 | -1.806269 | -1.408379 | -0.081075 |
| 1 | 0 | -5.055151 | 1.290867  | -0.574841 |
| 1 | 0 | -3.364934 | 1.786762  | -1.133699 |
| 1 | 0 | 5.034365  | -0.779500 | -0.930423 |
| 1 | 0 | 4.973712  | -1.067457 | 0.806148  |
| 1 | 0 | 5.237004  | 0.568278  | 0.194519  |
| 1 | 0 | -5.431357 | -0.781550 | 0.545311  |
| 1 | 0 | -4.111633 | -1.205554 | 1.651603  |
| 1 | 0 | -4.265792 | -2.041975 | 0.111686  |

**p3**

|   |   |           |           |           |
|---|---|-----------|-----------|-----------|
| 6 | 0 | -0.061409 | 0.998228  | 0.002472  |
| 6 | 0 | -0.066268 | -0.397806 | 0.004569  |
| 6 | 0 | -1.291327 | -1.078936 | 0.002426  |
| 6 | 0 | -2.513602 | -0.413598 | -0.001413 |

|   |   |           |           |           |
|---|---|-----------|-----------|-----------|
| 6 | 0 | -2.493210 | 0.987885  | -0.003446 |
| 6 | 0 | -1.288863 | 1.674138  | -0.001691 |
| 6 | 0 | 1.228849  | 1.788707  | 0.004625  |
| 6 | 0 | 1.219370  | -1.198492 | 0.009389  |
| 6 | 0 | 2.488552  | -0.385378 | -0.001091 |
| 6 | 0 | 2.471489  | 0.947683  | -0.003083 |
| 6 | 0 | -3.821965 | -1.167485 | -0.003515 |
| 6 | 0 | 3.769299  | -1.176491 | -0.007914 |
| 1 | 0 | -1.282809 | -2.166024 | 0.003786  |
| 1 | 0 | -3.428084 | 1.540010  | -0.006696 |
| 1 | 0 | -1.292663 | 2.760401  | -0.003619 |
| 1 | 0 | 1.242173  | 2.465367  | -0.861718 |
| 1 | 0 | 1.245999  | 2.454441  | 0.879539  |
| 1 | 0 | 1.225868  | -1.879296 | -0.854379 |
| 1 | 0 | 1.230016  | -1.862509 | 0.886256  |
| 1 | 0 | 3.415552  | 1.487728  | -0.009995 |
| 1 | 0 | -4.421306 | -0.920868 | -0.885616 |
| 1 | 0 | -4.424933 | -0.919407 | 0.875701  |
| 1 | 0 | -3.659375 | -2.247112 | -0.002298 |
| 1 | 0 | 4.645218  | -0.524911 | -0.013332 |
| 1 | 0 | 3.824388  | -1.829886 | -0.886815 |
| 1 | 0 | 3.834466  | -1.828664 | 0.871219  |

**p4**

|   |   |           |           |           |
|---|---|-----------|-----------|-----------|
| 6 | 0 | 0.539912  | -0.737077 | 0.817491  |
| 6 | 0 | 1.914992  | -0.933739 | 0.776795  |
| 6 | 0 | 2.744956  | -0.105835 | 0.011146  |
| 6 | 0 | 2.145741  | 0.931737  | -0.705316 |
| 6 | 0 | 0.768117  | 1.137036  | -0.661837 |
| 6 | 0 | -0.060055 | 0.307472  | 0.100106  |
| 6 | 0 | -1.955554 | 1.759298  | 0.629006  |
| 6 | 0 | -1.530799 | 0.564915  | 0.183370  |
| 6 | 0 | -2.480504 | -0.497226 | -0.236388 |
| 6 | 0 | -2.071800 | -1.590312 | -0.896659 |
| 6 | 0 | 4.234201  | -0.345564 | -0.050435 |
| 6 | 0 | -3.946570 | -0.300018 | 0.072013  |
| 1 | 0 | -0.077762 | -1.390344 | 1.423281  |
| 1 | 0 | 2.353586  | -1.741995 | 1.354186  |
| 1 | 0 | 2.762756  | 1.590077  | -1.308843 |
| 1 | 0 | 0.325609  | 1.946042  | -1.232332 |
| 1 | 0 | -3.005352 | 2.013778  | 0.697889  |
| 1 | 0 | -1.249165 | 2.518497  | 0.942023  |
| 1 | 0 | -2.781130 | -2.349278 | -1.207193 |
| 1 | 0 | -1.033817 | -1.754818 | -1.153843 |
| 1 | 0 | 4.469826  | -1.205099 | -0.687349 |
| 1 | 0 | 4.645400  | -0.555082 | 0.940816  |

|   |   |           |           |           |
|---|---|-----------|-----------|-----------|
| 1 | 0 | 4.760303  | 0.520261  | -0.457896 |
| 1 | 0 | -4.526424 | -1.169486 | -0.240266 |
| 1 | 0 | -4.349064 | 0.574968  | -0.448462 |
| 1 | 0 | -4.110581 | -0.141652 | 1.142236  |

**p5**

|   |   |           |           |           |
|---|---|-----------|-----------|-----------|
| 6 | 0 | -2.426779 | -0.488373 | 0.035110  |
| 6 | 0 | -2.483691 | 0.873616  | 0.347212  |
| 6 | 0 | -1.339975 | 1.675590  | 0.317069  |
| 6 | 0 | -0.120964 | 1.112496  | -0.034567 |
| 6 | 0 | -0.045278 | -0.257830 | -0.328693 |
| 6 | 0 | -1.186585 | -1.050873 | -0.297855 |
| 6 | 0 | 1.232430  | 1.782926  | -0.194379 |
| 6 | 0 | 2.186741  | 0.627575  | -0.504663 |
| 6 | 0 | 1.361316  | -0.653276 | -0.619049 |
| 6 | 0 | 2.351650  | -0.461959 | 0.519441  |
| 6 | 0 | -3.675883 | -1.338477 | 0.040184  |
| 6 | 0 | 3.625569  | -1.277192 | 0.546931  |
| 1 | 0 | -3.438252 | 1.316572  | 0.612920  |
| 1 | 0 | -1.414901 | 2.732207  | 0.554595  |
| 1 | 0 | -1.120758 | -2.110985 | -0.525347 |
| 1 | 0 | 1.531373  | 2.338413  | 0.701739  |
| 1 | 0 | 1.213079  | 2.502148  | -1.021368 |
| 1 | 0 | 3.013322  | 0.805128  | -1.183199 |
| 1 | 0 | 1.573478  | -1.411768 | -1.364712 |
| 1 | 0 | 1.905582  | -0.279089 | 1.494270  |
| 1 | 0 | -4.034403 | -1.520429 | -0.978978 |
| 1 | 0 | -4.484979 | -0.854903 | 0.591693  |
| 1 | 0 | -3.492724 | -2.314553 | 0.497728  |
| 1 | 0 | 3.458695  | -2.259617 | 0.999285  |
| 1 | 0 | 4.405561  | -0.770360 | 1.124202  |
| 1 | 0 | 4.013622  | -1.438103 | -0.463267 |

**p6**

|   |   |           |           |           |
|---|---|-----------|-----------|-----------|
| 6 | 0 | -0.180687 | 1.338153  | -0.000215 |
| 6 | 0 | 1.204104  | 1.191811  | -0.000461 |
| 6 | 0 | 1.794145  | -0.072415 | -0.000674 |
| 6 | 0 | 0.943977  | -1.188241 | -0.001039 |
| 6 | 0 | -0.434677 | -1.045933 | -0.000742 |
| 6 | 0 | -1.032188 | 0.226267  | -0.000224 |
| 6 | 0 | -3.447079 | -0.493184 | 0.001130  |
| 6 | 0 | -2.487689 | 0.436039  | 0.000004  |
| 6 | 0 | 3.292976  | -0.245425 | 0.001311  |
| 1 | 0 | -0.611591 | 2.334372  | -0.000211 |
| 1 | 0 | 1.833772  | 2.075799  | -0.000615 |
| 1 | 0 | 1.374854  | -2.184949 | -0.001736 |

|   |   |           |           |           |
|---|---|-----------|-----------|-----------|
| 1 | 0 | -1.055717 | -1.934242 | -0.001254 |
| 1 | 0 | -4.493026 | -0.211383 | 0.001216  |
| 1 | 0 | -3.235221 | -1.556635 | 0.002039  |
| 1 | 0 | -2.791368 | 1.480935  | -0.000740 |
| 1 | 0 | 3.628864  | -0.782536 | 0.894101  |
| 1 | 0 | 3.805030  | 0.718502  | -0.020552 |
| 1 | 0 | 3.627094  | -0.822295 | -0.866776 |

**p7**

|   |   |           |           |           |
|---|---|-----------|-----------|-----------|
| 6 | 0 | -2.507720 | -1.169362 | 0.280095  |
| 6 | 0 | -3.026910 | 0.100591  | 0.003885  |
| 6 | 0 | -2.126547 | 1.100203  | -0.375473 |
| 6 | 0 | -0.759650 | 0.854566  | -0.454308 |
| 6 | 0 | -0.231102 | -0.411278 | -0.151671 |
| 6 | 0 | -1.145308 | -1.421893 | 0.195065  |
| 6 | 0 | 1.195334  | -0.748142 | -0.235812 |
| 6 | 0 | 2.288116  | 0.003996  | 0.036637  |
| 6 | 0 | 3.603598  | -0.601074 | -0.186696 |
| 6 | 0 | 4.794389  | -0.012189 | -0.021683 |
| 6 | 0 | -4.504733 | 0.381237  | 0.121777  |
| 6 | 0 | 2.242006  | 1.408139  | 0.584323  |
| 1 | 0 | -3.182155 | -1.973084 | 0.558857  |
| 1 | 0 | -2.502030 | 2.087123  | -0.627519 |
| 1 | 0 | -0.102313 | 1.644478  | -0.794098 |
| 1 | 0 | -0.772769 | -2.418678 | 0.408341  |
| 1 | 0 | 1.386482  | -1.775377 | -0.541112 |
| 1 | 0 | 3.583843  | -1.631194 | -0.536311 |
| 1 | 0 | 5.713037  | -0.549485 | -0.224645 |
| 1 | 0 | 4.898352  | 1.013854  | 0.311172  |
| 1 | 0 | -4.774036 | 0.644884  | 1.150781  |
| 1 | 0 | -5.100543 | -0.491655 | -0.156185 |
| 1 | 0 | -4.804977 | 1.214255  | -0.517867 |
| 1 | 0 | 1.260877  | 1.654980  | 0.986604  |
| 1 | 0 | 2.493230  | 2.148951  | -0.183217 |
| 1 | 0 | 2.974169  | 1.522189  | 1.388359  |

**p8**

|   |   |           |           |           |
|---|---|-----------|-----------|-----------|
| 6 | 0 | 0.992398  | -1.346305 | -0.414834 |
| 6 | 0 | 2.372160  | -1.194656 | -0.398045 |
| 6 | 0 | 2.964753  | -0.013939 | 0.064326  |
| 6 | 0 | 2.118409  | 0.999529  | 0.522756  |
| 6 | 0 | 0.734956  | 0.854634  | 0.502127  |
| 6 | 0 | 0.134709  | -0.318050 | 0.014708  |
| 6 | 0 | -1.315694 | -0.545925 | -0.019399 |
| 6 | 0 | -2.319805 | 0.334227  | -0.226832 |
| 6 | 0 | -3.722920 | -0.113837 | -0.159452 |

|   |   |           |           |           |
|---|---|-----------|-----------|-----------|
| 6 | 0 | -4.226761 | -1.007923 | 0.695897  |
| 6 | 0 | 4.463554  | 0.160292  | 0.057241  |
| 6 | 0 | -2.130845 | 1.787321  | -0.594535 |
| 1 | 0 | 0.561409  | -2.275820 | -0.772796 |
| 1 | 0 | 3.002109  | -2.008529 | -0.743624 |
| 1 | 0 | 2.548986  | 1.915162  | 0.916233  |
| 1 | 0 | 0.117479  | 1.646888  | 0.905416  |
| 1 | 0 | -1.605571 | -1.587376 | 0.096846  |
| 1 | 0 | -4.401841 | 0.367894  | -0.862255 |
| 1 | 0 | -5.272449 | -1.291224 | 0.661088  |
| 1 | 0 | -3.615972 | -1.473608 | 1.461829  |
| 1 | 0 | 4.976209  | -0.781586 | 0.268004  |
| 1 | 0 | 4.783498  | 0.893924  | 0.800605  |
| 1 | 0 | 4.814401  | 0.509887  | -0.920295 |
| 1 | 0 | -1.134858 | 1.990588  | -0.987828 |
| 1 | 0 | -2.298175 | 2.444974  | 0.266523  |
| 1 | 0 | -2.864697 | 2.076612  | -1.353490 |

**p9**

|   |   |           |           |           |
|---|---|-----------|-----------|-----------|
| 6 | 0 | -0.117982 | -0.691461 | 0.004440  |
| 6 | 0 | 0.242477  | 0.657290  | 0.003772  |
| 6 | 0 | 1.600540  | 1.003888  | 0.000374  |
| 6 | 0 | 2.613207  | 0.049536  | -0.002127 |
| 6 | 0 | 2.236579  | -1.300593 | -0.001433 |
| 6 | 0 | 0.897084  | -1.657549 | 0.001648  |
| 6 | 0 | -1.566156 | -1.133128 | 0.008326  |
| 6 | 0 | -0.800571 | 1.754143  | 0.006561  |
| 6 | 0 | -2.218894 | 1.264199  | -0.002137 |
| 6 | 0 | -2.581373 | -0.018876 | -0.001559 |
| 6 | 0 | 4.070480  | 0.445443  | -0.005789 |
| 6 | 0 | -4.023298 | -0.450968 | -0.009617 |
| 1 | 0 | 1.868833  | 2.057362  | -0.000431 |
| 1 | 0 | 2.999894  | -2.072703 | -0.003568 |
| 1 | 0 | 0.624768  | -2.709191 | 0.001882  |
| 1 | 0 | -1.749190 | -1.787853 | -0.856237 |
| 1 | 0 | -1.749593 | -1.772126 | 0.884659  |
| 1 | 0 | -0.637070 | 2.411578  | -0.859142 |
| 1 | 0 | -0.644187 | 2.400491  | 0.882076  |
| 1 | 0 | -2.990243 | 2.030948  | -0.008625 |
| 1 | 0 | 4.586470  | 0.053215  | -0.887820 |
| 1 | 0 | 4.590970  | 0.052912  | 0.873456  |
| 1 | 0 | 4.188122  | 1.530891  | -0.005930 |
| 1 | 0 | -4.700664 | 0.405114  | -0.014380 |
| 1 | 0 | -4.255506 | -1.065224 | 0.868594  |
| 1 | 0 | -4.245161 | -1.066956 | -0.889282 |

**p10**

|   |   |           |           |           |
|---|---|-----------|-----------|-----------|
| 6 | 0 | 0.150582  | -0.788207 | 0.778000  |
| 6 | 0 | 1.530388  | -0.951055 | 0.726069  |
| 6 | 0 | 2.339008  | -0.070175 | -0.000930 |
| 6 | 0 | 1.714579  | 0.986783  | -0.667386 |
| 6 | 0 | 0.333718  | 1.158080  | -0.613345 |
| 6 | 0 | -0.473845 | 0.275134  | 0.111620  |
| 6 | 0 | -2.437518 | 1.664033  | 0.635168  |
| 6 | 0 | -1.947631 | 0.489849  | 0.202490  |
| 6 | 0 | -2.873907 | -0.580583 | -0.197248 |
| 6 | 0 | -2.555997 | -1.729934 | -0.800289 |
| 6 | 0 | 3.832537  | -0.274119 | -0.082078 |
| 1 | 0 | -0.449271 | -1.480159 | 1.358001  |
| 1 | 0 | 1.988796  | -1.774548 | 1.265018  |
| 1 | 0 | 2.315302  | 1.686871  | -1.239585 |
| 1 | 0 | -0.128570 | 1.981490  | -1.146221 |
| 1 | 0 | -3.506510 | 1.839740  | 0.690750  |
| 1 | 0 | -1.786517 | 2.470799  | 0.949007  |
| 1 | 0 | -3.921538 | -0.373719 | 0.010388  |
| 1 | 0 | -3.323750 | -2.445027 | -1.071512 |
| 1 | 0 | -1.533281 | -1.988109 | -1.047554 |
| 1 | 0 | 4.088868  | -1.004520 | -0.857479 |
| 1 | 0 | 4.235662  | -0.648437 | 0.862289  |
| 1 | 0 | 4.349329  | 0.656777  | -0.325527 |

**p11**

|   |   |           |           |           |
|---|---|-----------|-----------|-----------|
| 6 | 0 | -2.499173 | -0.246409 | -0.081290 |
| 6 | 0 | -2.338754 | 1.133087  | 0.080545  |
| 6 | 0 | -1.070239 | 1.715079  | 0.153229  |
| 6 | 0 | 0.055627  | 0.909207  | 0.059660  |
| 6 | 0 | -0.090940 | -0.479371 | -0.081846 |
| 6 | 0 | -1.354467 | -1.053073 | -0.154959 |
| 6 | 0 | 1.519742  | 1.304929  | 0.047751  |
| 6 | 0 | 2.283945  | -0.027470 | -0.007152 |
| 6 | 0 | 1.243273  | -1.140026 | -0.103545 |
| 6 | 0 | 2.074321  | -0.956758 | 1.158672  |
| 6 | 0 | -3.875325 | -0.860942 | -0.188397 |
| 6 | 0 | 3.586105  | -0.068460 | -0.772734 |
| 1 | 0 | -3.219119 | 1.764494  | 0.145548  |
| 1 | 0 | -0.975133 | 2.790337  | 0.268280  |
| 1 | 0 | -1.460455 | -2.128727 | -0.262894 |
| 1 | 0 | 1.802082  | 1.904727  | 0.920198  |
| 1 | 0 | 1.749031  | 1.908894  | -0.839046 |
| 1 | 0 | 1.406723  | -2.024805 | -0.708870 |
| 1 | 0 | 1.568257  | -0.595281 | 2.047696  |
| 1 | 0 | 2.850549  | -1.690802 | 1.347195  |

|   |   |           |           |           |
|---|---|-----------|-----------|-----------|
| 1 | 0 | -4.103931 | -1.141338 | -1.222457 |
| 1 | 0 | -4.649272 | -0.165362 | 0.142794  |
| 1 | 0 | -3.955875 | -1.767593 | 0.417748  |
| 1 | 0 | 3.997161  | -1.081105 | -0.803471 |
| 1 | 0 | 4.337556  | 0.578706  | -0.307201 |
| 1 | 0 | 3.447738  | 0.269097  | -1.805125 |

**p12**

|   |   |           |           |           |
|---|---|-----------|-----------|-----------|
| 6 | 0 | -0.002164 | -1.139665 | -0.225439 |
| 6 | 0 | -1.394470 | -1.175730 | -0.230617 |
| 6 | 0 | -2.150902 | -0.024098 | -0.009059 |
| 6 | 0 | -1.458421 | 1.171311  | 0.220280  |
| 6 | 0 | -0.071170 | 1.211867  | 0.222694  |
| 6 | 0 | 0.694274  | 0.057576  | -0.013068 |
| 6 | 0 | 2.847611  | 1.197922  | -0.421792 |
| 6 | 0 | 2.180997  | 0.105041  | -0.030307 |
| 6 | 0 | -3.659450 | -0.062645 | 0.011725  |
| 6 | 0 | 2.927070  | -1.136151 | 0.402857  |
| 1 | 0 | 0.543109  | -2.057862 | -0.407892 |
| 1 | 0 | -1.899631 | -2.119377 | -0.411292 |
| 1 | 0 | -2.016441 | 2.083046  | 0.411282  |
| 1 | 0 | 0.431612  | 2.148466  | 0.433464  |
| 1 | 0 | 3.931234  | 1.228216  | -0.409685 |
| 1 | 0 | 2.340509  | 2.084742  | -0.782443 |
| 1 | 0 | -4.044284 | 0.060439  | 1.029797  |
| 1 | 0 | -4.038669 | -1.011831 | -0.372260 |
| 1 | 0 | -4.086686 | 0.741277  | -0.594437 |
| 1 | 0 | 4.000118  | -0.945604 | 0.453558  |
| 1 | 0 | 2.771723  | -1.963012 | -0.297962 |
| 1 | 0 | 2.587158  | -1.481066 | 1.384232  |

**CH<sub>2</sub>C(CH<sub>2</sub>)CHCH<sub>2</sub>**

|   |   |           |           |           |
|---|---|-----------|-----------|-----------|
| 6 | 0 | 1.998322  | 0.006097  | 0.024104  |
| 6 | 0 | 0.820354  | -0.616138 | -0.028707 |
| 6 | 0 | -0.525693 | 0.004887  | -0.006177 |
| 6 | 0 | -1.622873 | -0.844013 | 0.019684  |
| 6 | 0 | -0.694623 | 1.390819  | -0.013629 |
| 1 | 0 | 2.924708  | -0.555380 | 0.002402  |
| 1 | 0 | 2.090383  | 1.084209  | 0.094030  |
| 1 | 0 | 0.815357  | -1.701813 | -0.089390 |
| 1 | 0 | -2.632769 | -0.452948 | 0.039447  |
| 1 | 0 | -1.503182 | -1.920347 | 0.021956  |
| 1 | 0 | -1.688340 | 1.820129  | 0.011215  |
| 1 | 0 | 0.140922  | 2.076236  | -0.051313 |

**CH<sub>2</sub>C(CH<sub>3</sub>)CCH<sub>2</sub>**

|   |   |           |           |           |
|---|---|-----------|-----------|-----------|
| 6 | 0 | 1.106851  | 1.334653  | 0.000023  |
| 6 | 0 | 0.447997  | 0.099905  | -0.000070 |
| 6 | 0 | -0.899160 | 0.012624  | -0.000012 |
| 6 | 0 | -2.195572 | -0.076762 | 0.000005  |
| 6 | 0 | 1.266175  | -1.185909 | 0.000000  |
| 1 | 0 | 2.188854  | 1.381381  | -0.000110 |
| 1 | 0 | 0.554361  | 2.264625  | 0.000216  |
| 1 | 0 | -2.771365 | -0.114783 | 0.924564  |
| 1 | 0 | -2.771415 | -0.114485 | -0.924535 |
| 1 | 0 | 0.624191  | -2.066618 | -0.002987 |
| 1 | 0 | 1.906553  | -1.229990 | 0.885206  |
| 1 | 0 | 1.911078  | -1.227194 | -0.882033 |

**CH<sub>2</sub>C(CH<sub>3</sub>)CHCH**

|   |   |           |           |           |
|---|---|-----------|-----------|-----------|
| 6 | 0 | 2.012584  | 0.096645  | -0.000112 |
| 6 | 0 | 0.909082  | -0.619297 | -0.000029 |
| 6 | 0 | -0.466406 | -0.096597 | -0.000098 |
| 6 | 0 | -1.504981 | -0.942851 | -0.000021 |
| 6 | 0 | -0.643164 | 1.399535  | 0.000047  |
| 1 | 0 | 3.078135  | -0.074205 | 0.000089  |
| 1 | 0 | 0.998850  | -1.711973 | 0.000678  |
| 1 | 0 | -2.527968 | -0.584687 | -0.000372 |
| 1 | 0 | -1.360427 | -2.017815 | 0.000249  |
| 1 | 0 | -1.699177 | 1.674028  | -0.003533 |
| 1 | 0 | -0.162843 | 1.845546  | -0.876347 |
| 1 | 0 | -0.169262 | 1.844489  | 0.880510  |

**CH<sub>2</sub>CHC(CH<sub>3</sub>)CH**

|   |   |           |           |           |
|---|---|-----------|-----------|-----------|
| 6 | 0 | 1.542288  | -1.057072 | 0.000044  |
| 6 | 0 | 0.540823  | -0.195027 | -0.000023 |
| 6 | 0 | -0.850525 | -0.672843 | -0.000050 |
| 6 | 0 | -1.940319 | 0.100662  | 0.000040  |
| 6 | 0 | 0.803369  | 1.302715  | -0.000022 |
| 1 | 0 | 2.622158  | -1.021170 | 0.000088  |
| 1 | 0 | -0.965821 | -1.752802 | -0.000133 |
| 1 | 0 | -2.932191 | -0.335406 | 0.000025  |
| 1 | 0 | -1.887283 | 1.183339  | 0.000133  |
| 1 | 0 | 0.358057  | 1.769452  | -0.883988 |
| 1 | 0 | 1.872552  | 1.516639  | -0.000399 |
| 1 | 0 | 0.358704  | 1.769334  | 0.884335  |

**TS i0-i1**

|   |   |           |           |           |
|---|---|-----------|-----------|-----------|
| 6 | 0 | -2.896352 | 0.995658  | 0.201872  |
| 6 | 0 | -3.099737 | -0.377742 | 0.023265  |
| 6 | 0 | -1.994658 | -1.188865 | -0.259066 |
| 6 | 0 | -0.706277 | -0.649670 | -0.359183 |



|   |   |           |           |           |
|---|---|-----------|-----------|-----------|
| 6 | 0 | -0.570272 | 0.705985  | -0.168819 |
| 6 | 0 | -1.616903 | 1.556897  | 0.107529  |
| 6 | 0 | -4.481384 | -0.975440 | 0.158344  |
| 1 | 0 | -3.745290 | 1.639361  | 0.414862  |
| 1 | 0 | -2.138405 | -2.255497 | -0.406908 |
| 1 | 0 | 0.145493  | -1.283373 | -0.582935 |
| 1 | 0 | -1.473933 | 2.623819  | 0.245323  |
| 1 | 0 | -4.701738 | -1.229950 | 1.200931  |
| 1 | 0 | -4.577922 | -1.891434 | -0.428888 |
| 1 | 0 | -5.252662 | -0.277655 | -0.176428 |
| 6 | 0 | 1.864093  | 1.638348  | -0.371175 |
| 6 | 0 | 2.631641  | 0.615641  | -0.799483 |
| 6 | 0 | 3.303121  | -0.365063 | 0.048246  |
| 6 | 0 | 4.020713  | -1.354740 | -0.512509 |
| 6 | 0 | 3.171581  | -0.243030 | 1.546497  |
| 1 | 0 | 1.745452  | 1.869301  | 0.679764  |
| 1 | 0 | 1.440966  | 2.345085  | -1.073143 |
| 1 | 0 | 2.753868  | 0.471619  | -1.870377 |
| 1 | 0 | 4.533310  | -2.097833 | 0.087419  |
| 1 | 0 | 4.114564  | -1.442728 | -1.589585 |
| 1 | 0 | 3.715394  | -1.041272 | 2.053591  |
| 1 | 0 | 2.122305  | -0.292861 | 1.853665  |
| 1 | 0 | 3.565201  | 0.715537  | 1.899606  |

**TS i0-i4**

|   |   |           |           |           |
|---|---|-----------|-----------|-----------|
| 6 | 0 | -0.950860 | 1.365542  | -0.034562 |
| 6 | 0 | -2.321739 | 1.142554  | 0.132083  |
| 6 | 0 | -2.857625 | -0.148950 | 0.073626  |
| 6 | 0 | -1.990110 | -1.221986 | -0.159164 |
| 6 | 0 | -0.615388 | -1.019344 | -0.326356 |
| 6 | 0 | -0.141906 | 0.272403  | -0.258052 |
| 6 | 0 | -4.335849 | -0.381826 | 0.284277  |
| 1 | 0 | -0.546004 | 2.370997  | 0.010637  |
| 1 | 0 | -2.981643 | 1.987665  | 0.307585  |
| 1 | 0 | -2.389419 | -2.231040 | -0.212036 |
| 1 | 0 | 0.050651  | -1.858366 | -0.499614 |
| 1 | 0 | -4.679345 | -1.271164 | -0.249214 |
| 1 | 0 | -4.926941 | 0.468894  | -0.063056 |
| 1 | 0 | -4.565696 | -0.527880 | 1.345495  |
| 6 | 0 | 2.283564  | 1.954723  | -0.328140 |
| 6 | 0 | 2.117510  | 0.653902  | -0.707062 |
| 6 | 0 | 2.666577  | -0.501862 | 0.031936  |
| 6 | 0 | 2.881438  | -1.659816 | -0.606370 |
| 6 | 0 | 2.990177  | -0.330572 | 1.493624  |
| 1 | 0 | 2.647015  | 2.228084  | 0.654685  |
| 1 | 0 | 1.995814  | 2.764805  | -0.986909 |

|   |   |          |           |           |
|---|---|----------|-----------|-----------|
| 1 | 0 | 1.864612 | 0.457715  | -1.744748 |
| 1 | 0 | 3.303164 | -2.519443 | -0.097829 |
| 1 | 0 | 2.653149 | -1.776213 | -1.660497 |
| 1 | 0 | 3.337604 | -1.268287 | 1.929492  |
| 1 | 0 | 2.109287 | 0.005152  | 2.049420  |
| 1 | 0 | 3.773030 | 0.420467  | 1.641559  |

TS **i0**-CH<sub>2</sub>C(CH<sub>2</sub>)CHCH<sub>2</sub>

|   |   |           |           |           |
|---|---|-----------|-----------|-----------|
| 6 | 0 | -2.719330 | 1.037427  | 0.413391  |
| 6 | 0 | -3.108491 | -0.214626 | -0.072840 |
| 6 | 0 | -2.120317 | -1.083298 | -0.552738 |
| 6 | 0 | -0.772148 | -0.717191 | -0.545957 |
| 6 | 0 | -0.435160 | 0.528872  | -0.052153 |
| 6 | 0 | -1.373800 | 1.420566  | 0.427308  |
| 6 | 0 | -4.560099 | -0.634102 | -0.062427 |
| 1 | 0 | -3.473969 | 1.725111  | 0.783957  |
| 1 | 0 | -2.406572 | -2.057701 | -0.938440 |
| 1 | 0 | -0.015435 | -1.397926 | -0.921600 |
| 1 | 0 | -1.088668 | 2.397911  | 0.803860  |
| 1 | 0 | -5.223070 | 0.228399  | 0.033160  |
| 1 | 0 | -4.770694 | -1.306163 | 0.776547  |
| 1 | 0 | -4.828366 | -1.165538 | -0.979218 |
| 6 | 0 | 2.778500  | -0.825180 | 1.886778  |
| 6 | 0 | 3.326121  | -0.831632 | 0.668089  |
| 6 | 0 | 3.073788  | 0.141768  | -0.404677 |
| 6 | 0 | 3.624144  | -0.056866 | -1.619688 |
| 6 | 0 | 2.190700  | 1.302217  | -0.140481 |
| 1 | 0 | 3.021803  | -1.593055 | 2.611559  |
| 1 | 0 | 2.065946  | -0.071537 | 2.200860  |
| 1 | 0 | 4.022047  | -1.627632 | 0.412987  |
| 1 | 0 | 3.459339  | 0.633704  | -2.438531 |
| 1 | 0 | 4.255075  | -0.915985 | -1.819301 |
| 1 | 0 | 1.010675  | 0.925523  | -0.082816 |
| 1 | 0 | 2.198503  | 2.041897  | -0.940341 |
| 1 | 0 | 2.349947  | 1.775260  | 0.829694  |

TS **i0**-CH<sub>2</sub>C(CH<sub>3</sub>)CCH<sub>2</sub>

|   |   |          |           |           |
|---|---|----------|-----------|-----------|
| 6 | 0 | 2.490393 | 0.135300  | -1.194508 |
| 6 | 0 | 3.199190 | -0.072270 | -0.005434 |
| 6 | 0 | 2.485220 | -0.128429 | 1.196522  |
| 6 | 0 | 1.095522 | 0.014302  | 1.217086  |
| 6 | 0 | 0.430641 | 0.214578  | 0.019849  |
| 6 | 0 | 1.101324 | 0.279336  | -1.189721 |
| 6 | 0 | 4.698606 | -0.256426 | -0.023974 |
| 1 | 0 | 3.030180 | 0.188042  | -2.135613 |
| 1 | 0 | 3.020718 | -0.282388 | 2.128816  |

|   |   |           |           |           |
|---|---|-----------|-----------|-----------|
| 1 | 0 | 0.554791  | -0.027320 | 2.157033  |
| 1 | 0 | 0.564552  | 0.443269  | -2.118491 |
| 1 | 0 | 4.964989  | -1.302987 | -0.208672 |
| 1 | 0 | 5.147258  | 0.031673  | 0.929352  |
| 1 | 0 | 5.164160  | 0.341672  | -0.811043 |
| 6 | 0 | -2.556380 | -1.774819 | -0.143074 |
| 6 | 0 | -3.077706 | -0.543238 | -0.045314 |
| 6 | 0 | -2.214667 | 0.629131  | 0.053379  |
| 6 | 0 | -2.522591 | 1.917149  | 0.159358  |
| 6 | 0 | -4.573245 | -0.312654 | -0.032625 |
| 1 | 0 | -3.190808 | -2.650824 | -0.216237 |
| 1 | 0 | -1.485164 | -1.935996 | -0.152225 |
| 1 | 0 | -1.750081 | 2.676353  | 0.224122  |
| 1 | 0 | -3.551603 | 2.270332  | 0.186590  |
| 1 | 0 | -4.877572 | 0.328800  | -0.865623 |
| 1 | 0 | -4.884952 | 0.186563  | 0.890198  |
| 1 | 0 | -5.113333 | -1.257533 | -0.111494 |
| 1 | 0 | -0.930982 | 0.378587  | 0.034024  |

TS **i0**-CH<sub>2</sub>C(CH<sub>3</sub>)CHCH

|   |   |           |           |           |
|---|---|-----------|-----------|-----------|
| 6 | 0 | -2.506775 | 0.018934  | 1.202478  |
| 6 | 0 | -3.192975 | -0.183492 | -0.000281 |
| 6 | 0 | -2.506749 | 0.021753  | -1.202498 |
| 6 | 0 | -1.165897 | 0.412616  | -1.209723 |
| 6 | 0 | -0.518619 | 0.592883  | 0.000687  |
| 6 | 0 | -1.165960 | 0.409757  | 1.210679  |
| 6 | 0 | -4.634243 | -0.636167 | -0.000721 |
| 1 | 0 | -3.026570 | -0.126644 | 2.144929  |
| 1 | 0 | -3.026504 | -0.121601 | -2.145306 |
| 1 | 0 | -0.648274 | 0.574215  | -2.149736 |
| 1 | 0 | 0.761108  | 1.000670  | 0.001102  |
| 1 | 0 | -0.648365 | 0.569127  | 2.151088  |
| 1 | 0 | -5.164391 | -0.278592 | -0.886448 |
| 1 | 0 | -5.166673 | -0.273107 | 0.881432  |
| 1 | 0 | -4.703219 | -1.729565 | 0.002643  |
| 6 | 0 | 1.951624  | 1.601484  | 0.001460  |
| 6 | 0 | 3.136308  | 0.996447  | 0.000801  |
| 6 | 0 | 3.441239  | -0.440563 | -0.000416 |
| 6 | 0 | 4.723375  | -0.834636 | -0.000933 |
| 6 | 0 | 2.310450  | -1.435810 | -0.001071 |
| 1 | 0 | 1.809041  | 2.677049  | 0.002340  |
| 1 | 0 | 4.019201  | 1.641127  | 0.001192  |
| 1 | 0 | 4.995615  | -1.883836 | -0.001838 |
| 1 | 0 | 5.536428  | -0.116683 | -0.000466 |
| 1 | 0 | 2.692756  | -2.457792 | -0.001942 |
| 1 | 0 | 1.669479  | -1.306097 | -0.877451 |

|   |   |          |           |          |
|---|---|----------|-----------|----------|
| 1 | 0 | 1.669702 | -1.307508 | 0.875680 |
|---|---|----------|-----------|----------|

TS i0-CH<sub>2</sub>CHC(CH<sub>3</sub>)CH

|   |   |           |           |           |
|---|---|-----------|-----------|-----------|
| 6 | 0 | -2.587435 | 0.041986  | 1.201260  |
| 6 | 0 | -3.279495 | 0.132565  | -0.012336 |
| 6 | 0 | -2.585868 | -0.134150 | -1.197587 |
| 6 | 0 | -1.232213 | -0.478641 | -1.178570 |
| 6 | 0 | -0.580652 | -0.554127 | 0.040578  |
| 6 | 0 | -1.234659 | -0.300944 | 1.235366  |
| 6 | 0 | -4.735607 | 0.534193  | -0.040138 |
| 1 | 0 | -3.112409 | 0.239751  | 2.131339  |
| 1 | 0 | -3.109088 | -0.074582 | -2.147401 |
| 1 | 0 | -0.706958 | -0.685382 | -2.105330 |
| 1 | 0 | -0.711023 | -0.369921 | 2.183290  |
| 1 | 0 | -4.844201 | 1.623572  | 0.000285  |
| 1 | 0 | -5.279795 | 0.121468  | 0.812985  |
| 1 | 0 | -5.226715 | 0.189726  | -0.952796 |
| 6 | 0 | 1.986586  | -1.292908 | 0.073092  |
| 6 | 0 | 2.968955  | -0.391606 | 0.019606  |
| 6 | 0 | 2.668684  | 1.045162  | -0.045664 |
| 6 | 0 | 3.571266  | 2.029633  | -0.101095 |
| 6 | 0 | 4.420705  | -0.827526 | 0.024449  |
| 1 | 0 | 2.099991  | -2.371041 | 0.122567  |
| 1 | 0 | 1.612724  | 1.299650  | -0.047519 |
| 1 | 0 | 3.261668  | 3.067021  | -0.147219 |
| 1 | 0 | 4.639114  | 1.843159  | -0.102609 |
| 1 | 0 | 4.932353  | -0.482851 | -0.879776 |
| 1 | 0 | 4.505154  | -1.913617 | 0.072877  |
| 1 | 0 | 4.951166  | -0.402746 | 0.882596  |
| 1 | 0 | 0.706413  | -0.906025 | 0.062942  |

TS i1-i2

|   |   |           |           |           |
|---|---|-----------|-----------|-----------|
| 6 | 0 | 1.192788  | -1.309887 | 0.206796  |
| 6 | 0 | 2.549965  | -1.182752 | -0.088721 |
| 6 | 0 | 3.160761  | 0.070597  | -0.148364 |
| 6 | 0 | 2.364592  | 1.196637  | 0.095496  |
| 6 | 0 | 1.011890  | 1.070650  | 0.388455  |
| 6 | 0 | 0.401522  | -0.187477 | 0.451030  |
| 6 | 0 | -1.078292 | -0.313138 | 0.746247  |
| 6 | 0 | -1.957049 | 0.036431  | -0.420952 |
| 6 | 0 | -3.420583 | 0.204544  | -0.267371 |
| 6 | 0 | -3.981849 | 1.411064  | -0.156678 |
| 6 | 0 | 4.633355  | 0.215721  | -0.449848 |
| 6 | 0 | -4.245800 | -1.066547 | -0.245551 |
| 1 | 0 | 0.745835  | -2.298455 | 0.248558  |
| 1 | 0 | 3.141235  | -2.074095 | -0.273733 |

|   |   |           |           |           |
|---|---|-----------|-----------|-----------|
| 1 | 0 | 2.812317  | 2.185188  | 0.056501  |
| 1 | 0 | 0.417872  | 1.960506  | 0.571891  |
| 1 | 0 | -1.346766 | 0.327454  | 1.597404  |
| 1 | 0 | -1.288305 | -1.340846 | 1.087013  |
| 1 | 0 | -1.540221 | -0.045044 | -1.421138 |
| 1 | 0 | -5.055314 | 1.529597  | -0.045884 |
| 1 | 0 | -3.385551 | 2.316419  | -0.178660 |
| 1 | 0 | 4.806655  | 0.940282  | -1.250924 |
| 1 | 0 | 5.071970  | -0.735676 | -0.757575 |
| 1 | 0 | 5.185018  | 0.566781  | 0.428606  |
| 1 | 0 | -5.310371 | -0.850749 | -0.130439 |
| 1 | 0 | -3.936966 | -1.721398 | 0.576492  |
| 1 | 0 | -4.105200 | -1.635018 | -1.171340 |

**TS i1-i4**

|   |   |           |           |           |
|---|---|-----------|-----------|-----------|
| 6 | 0 | -0.544502 | 0.764481  | 0.886782  |
| 6 | 0 | -1.815485 | 1.089781  | 0.498804  |
| 6 | 0 | -2.641307 | 0.198879  | -0.229360 |
| 6 | 0 | -2.128574 | -1.097604 | -0.489139 |
| 6 | 0 | -0.869743 | -1.469941 | -0.112358 |
| 6 | 0 | 0.060062  | -0.528425 | 0.535150  |
| 6 | 0 | 1.192304  | -1.085230 | 1.392688  |
| 6 | 0 | 1.564023  | -0.663254 | 0.004695  |
| 6 | 0 | 2.543104  | 0.412142  | -0.329352 |
| 6 | 0 | 2.454831  | 1.707426  | -0.015734 |
| 6 | 0 | -4.007639 | 0.607847  | -0.704211 |
| 6 | 0 | 3.739939  | -0.110379 | -1.095402 |
| 1 | 0 | 0.014483  | 1.448355  | 1.511762  |
| 1 | 0 | -2.217597 | 2.057812  | 0.784262  |
| 1 | 0 | -2.764829 | -1.821508 | -0.990325 |
| 1 | 0 | -0.517445 | -2.477926 | -0.308004 |
| 1 | 0 | 1.169727  | -2.143043 | 1.633716  |
| 1 | 0 | 1.526443  | -0.444028 | 2.201235  |
| 1 | 0 | 1.624830  | -1.493400 | -0.693250 |
| 1 | 0 | 3.246845  | 2.392869  | -0.296375 |
| 1 | 0 | 1.607970  | 2.135964  | 0.498376  |
| 1 | 0 | -4.693316 | -0.243703 | -0.735089 |
| 1 | 0 | -3.973552 | 1.029102  | -1.717801 |
| 1 | 0 | -4.445510 | 1.371033  | -0.055038 |
| 1 | 0 | 4.457120  | 0.684608  | -1.306729 |
| 1 | 0 | 3.428591  | -0.552327 | -2.048672 |
| 1 | 0 | 4.254160  | -0.898142 | -0.533447 |

**TS i1-i5**

|   |   |           |           |           |
|---|---|-----------|-----------|-----------|
| 6 | 0 | -2.559114 | -0.464511 | -0.032111 |
| 6 | 0 | -2.484995 | 0.890418  | -0.393675 |

|   |   |           |           |           |
|---|---|-----------|-----------|-----------|
| 6 | 0 | -1.312668 | 1.630103  | -0.186762 |
| 6 | 0 | -0.201821 | 1.057562  | 0.403564  |
| 6 | 0 | -0.247765 | -0.325068 | 0.772665  |
| 6 | 0 | -1.452488 | -1.048193 | 0.573244  |
| 6 | 0 | 1.179154  | 1.661754  | 0.370764  |
| 6 | 0 | 2.035852  | 0.667042  | -0.449536 |
| 6 | 0 | 1.450686  | -0.696856 | -0.516341 |
| 6 | 0 | 2.710494  | -0.516810 | 0.239285  |
| 6 | 0 | -3.822234 | -1.254180 | -0.283209 |
| 6 | 0 | 4.020757  | -1.080428 | -0.279535 |
| 1 | 0 | -3.344222 | 1.369114  | -0.852621 |
| 1 | 0 | -1.267263 | 2.661929  | -0.522149 |
| 1 | 0 | 0.421044  | -0.687082 | 1.547412  |
| 1 | 0 | -1.510070 | -2.077272 | 0.913638  |
| 1 | 0 | 1.593932  | 1.788398  | 1.377990  |
| 1 | 0 | 1.169788  | 2.647765  | -0.098886 |
| 1 | 0 | 2.531623  | 1.076547  | -1.326379 |
| 1 | 0 | 1.256642  | -1.327948 | -1.373773 |
| 1 | 0 | 2.635599  | -0.514848 | 1.328499  |
| 1 | 0 | -3.954538 | -1.457787 | -1.351293 |
| 1 | 0 | -4.707948 | -0.708203 | 0.054109  |
| 1 | 0 | -3.800956 | -2.214671 | 0.235911  |
| 1 | 0 | 4.135925  | -2.131776 | 0.001970  |
| 1 | 0 | 4.875108  | -0.528238 | 0.125711  |
| 1 | 0 | 4.070180  | -1.020925 | -1.370263 |

### TS il-p1

|   |   |           |           |           |
|---|---|-----------|-----------|-----------|
| 6 | 0 | 2.622688  | 1.160911  | -0.169683 |
| 6 | 0 | 3.201094  | -0.103380 | -0.041545 |
| 6 | 0 | 2.343390  | -1.194452 | 0.155620  |
| 6 | 0 | 0.967451  | -1.031160 | 0.213045  |
| 6 | 0 | 0.382450  | 0.238284  | 0.071072  |
| 6 | 0 | 1.242969  | 1.329350  | -0.110788 |
| 6 | 0 | -1.069084 | 0.467608  | 0.105517  |
| 6 | 0 | -2.033714 | -0.475378 | -0.056213 |
| 6 | 0 | -3.466069 | -0.227404 | -0.095505 |
| 6 | 0 | -4.315886 | -1.258667 | -0.258464 |
| 6 | 0 | 4.695154  | -0.298498 | -0.119946 |
| 6 | 0 | -3.973463 | 1.185490  | 0.056729  |
| 1 | 0 | 3.259536  | 2.027787  | -0.313947 |
| 1 | 0 | 2.765097  | -2.187815 | 0.274880  |
| 1 | 0 | 0.341844  | -1.898484 | 0.389278  |
| 1 | 0 | 0.822341  | 2.325033  | -0.208787 |
| 1 | 0 | -1.363752 | 1.512391  | 0.108695  |
| 1 | 0 | -1.740441 | -1.516838 | -0.154091 |
| 1 | 0 | -5.389107 | -1.112273 | -0.292389 |

|   |   |           |           |           |
|---|---|-----------|-----------|-----------|
| 1 | 0 | -3.955174 | -2.276310 | -0.361447 |
| 1 | 0 | 5.225334  | 0.653584  | -0.052473 |
| 1 | 0 | 4.982479  | -0.771360 | -1.065404 |
| 1 | 0 | 5.055581  | -0.943619 | 0.686252  |
| 1 | 0 | -5.062871 | 1.215964  | 0.013286  |
| 1 | 0 | -3.584009 | 1.834943  | -0.733876 |
| 1 | 0 | -3.655772 | 1.613115  | 1.013108  |
| 1 | 0 | -1.282967 | 0.767677  | 2.197880  |

**TS i2-i3**

|   |   |           |           |           |
|---|---|-----------|-----------|-----------|
| 6 | 0 | -0.046138 | 1.063366  | 0.277589  |
| 6 | 0 | -0.183678 | -0.250242 | 0.831824  |
| 6 | 0 | 2.477104  | 0.842436  | 0.131549  |
| 6 | 0 | 1.292767  | 1.753589  | 0.366760  |
| 6 | 0 | -1.099898 | 1.582834  | -0.454209 |
| 6 | 0 | -2.307219 | 0.887325  | -0.594239 |
| 6 | 0 | -2.495309 | -0.363303 | 0.021294  |
| 6 | 0 | -1.450572 | -0.895792 | 0.761474  |
| 6 | 0 | -3.814769 | -1.086228 | -0.110224 |
| 6 | 0 | 1.158371  | -1.138618 | -0.546332 |
| 6 | 0 | 2.422224  | -0.449839 | -0.241072 |
| 6 | 0 | 3.676150  | -1.297826 | -0.285063 |
| 1 | 0 | 0.487994  | -0.541773 | 1.632132  |
| 1 | 0 | 3.448991  | 1.280290  | 0.345169  |
| 1 | 0 | 1.415424  | 2.209190  | 1.360809  |
| 1 | 0 | 1.317699  | 2.593878  | -0.339144 |
| 1 | 0 | -0.986484 | 2.550498  | -0.934177 |
| 1 | 0 | -3.114641 | 1.327738  | -1.170263 |
| 1 | 0 | -1.583807 | -1.842742 | 1.275005  |
| 1 | 0 | -4.649874 | -0.448053 | 0.194142  |
| 1 | 0 | -3.838223 | -1.987929 | 0.505150  |
| 1 | 0 | -3.998636 | -1.385670 | -1.147260 |
| 1 | 0 | 0.599137  | -0.844353 | -1.427034 |
| 1 | 0 | 1.137146  | -2.211836 | -0.363667 |
| 1 | 0 | 3.586192  | -2.153406 | 0.394586  |
| 1 | 0 | 4.559726  | -0.724857 | 0.005108  |
| 1 | 0 | 3.845167  | -1.707192 | -1.286668 |

**TS i2-p2**

|   |   |           |           |           |
|---|---|-----------|-----------|-----------|
| 6 | 0 | -1.290729 | 1.315580  | -0.339814 |
| 6 | 0 | -2.663875 | 1.094832  | -0.388109 |
| 6 | 0 | -3.207398 | -0.144540 | -0.045770 |
| 6 | 0 | -2.322143 | -1.156319 | 0.352623  |
| 6 | 0 | -0.953466 | -0.940557 | 0.402439  |
| 6 | 0 | -0.403082 | 0.302253  | 0.045403  |
| 6 | 0 | 1.040699  | 0.577797  | 0.053655  |

|   |   |           |           |           |
|---|---|-----------|-----------|-----------|
| 6 | 0 | 2.033761  | -0.344425 | 0.034861  |
| 6 | 0 | 3.471978  | -0.064734 | -0.014113 |
| 6 | 0 | 4.015540  | 1.063924  | 0.466681  |
| 6 | 0 | -4.695142 | -0.392644 | -0.085468 |
| 6 | 0 | 4.325965  | -1.152685 | -0.625586 |
| 1 | 0 | -0.896584 | 2.289797  | -0.610826 |
| 1 | 0 | -3.322651 | 1.900626  | -0.695581 |
| 1 | 0 | -2.717179 | -2.126791 | 0.637435  |
| 1 | 0 | -0.305274 | -1.741073 | 0.739981  |
| 1 | 0 | 1.310896  | 1.619986  | -0.092056 |
| 1 | 0 | 1.763344  | -1.398036 | 0.029641  |
| 1 | 0 | 5.081667  | 1.247275  | 0.396849  |
| 1 | 0 | 3.418797  | 1.820762  | 0.961749  |
| 1 | 0 | -5.086137 | -0.618506 | 0.911909  |
| 1 | 0 | -4.938620 | -1.244567 | -0.727842 |
| 1 | 0 | -5.233807 | 0.477749  | -0.464956 |
| 1 | 0 | 5.383859  | -0.886151 | -0.611737 |
| 1 | 0 | 4.033291  | -1.347366 | -1.662697 |
| 1 | 0 | 4.204988  | -2.094229 | -0.078407 |
| 1 | 0 | 1.190760  | 1.149637  | 2.125735  |

### TS i3-p3

|   |   |           |           |           |
|---|---|-----------|-----------|-----------|
| 6 | 0 | -0.062836 | 1.015290  | -0.025319 |
| 6 | 0 | -0.060804 | -0.395893 | 0.073602  |
| 6 | 0 | 1.216996  | -1.185220 | -0.163572 |
| 6 | 0 | 2.487183  | -0.384072 | -0.031502 |
| 6 | 0 | 2.470329  | 0.947480  | 0.033420  |
| 6 | 0 | 1.231155  | 1.794141  | -0.011105 |
| 6 | 0 | -1.287445 | 1.682213  | -0.051008 |
| 6 | 0 | -2.492149 | 0.990880  | -0.032943 |
| 6 | 0 | -2.514019 | -0.414294 | -0.006099 |
| 6 | 0 | -1.300498 | -1.081917 | 0.018734  |
| 6 | 0 | 3.763600  | -1.180208 | 0.000521  |
| 6 | 0 | -3.825659 | -1.161653 | -0.006437 |
| 1 | 0 | 0.155259  | -0.394366 | 1.892500  |
| 1 | 0 | 1.175093  | -1.615438 | -1.175803 |
| 1 | 0 | 1.250839  | -2.044531 | 0.515869  |
| 1 | 0 | 3.412031  | 1.484499  | 0.119015  |
| 1 | 0 | 1.228259  | 2.476343  | 0.851250  |
| 1 | 0 | 1.269508  | 2.453547  | -0.890223 |
| 1 | 0 | -1.296357 | 2.767625  | -0.090168 |
| 1 | 0 | -3.427577 | 1.540959  | -0.056543 |
| 1 | 0 | -1.287991 | -2.168085 | 0.027939  |
| 1 | 0 | 4.641260  | -0.532755 | 0.050407  |
| 1 | 0 | 3.856922  | -1.812656 | -0.890554 |
| 1 | 0 | 3.784186  | -1.852508 | 0.866295  |



|   |   |           |           |           |
|---|---|-----------|-----------|-----------|
| 1 | 0 | -3.671643 | -2.236137 | -0.123309 |
| 1 | 0 | -4.476798 | -0.823528 | -0.817918 |
| 1 | 0 | -4.368112 | -1.003461 | 0.931493  |

**TS i4-p4**

|   |   |           |           |           |
|---|---|-----------|-----------|-----------|
| 6 | 0 | 0.583474  | -0.769506 | 0.828815  |
| 6 | 0 | 1.956074  | -0.962379 | 0.737951  |
| 6 | 0 | 2.761969  | -0.106480 | -0.022824 |
| 6 | 0 | 2.138180  | 0.946849  | -0.693220 |
| 6 | 0 | 0.761907  | 1.145881  | -0.601739 |
| 6 | 0 | -0.040316 | 0.295894  | 0.165934  |
| 6 | 0 | -1.962943 | 1.799819  | 0.508936  |
| 6 | 0 | -1.519829 | 0.535040  | 0.253481  |
| 6 | 0 | -2.452700 | -0.512278 | -0.265888 |
| 6 | 0 | -2.010288 | -1.555109 | -0.979035 |
| 6 | 0 | 4.255854  | -0.309749 | -0.095608 |
| 6 | 0 | -3.926319 | -0.334464 | 0.007284  |
| 1 | 0 | -0.016881 | -1.441863 | 1.430686  |
| 1 | 0 | 2.411814  | -1.790985 | 1.271273  |
| 1 | 0 | 2.732951  | 1.620813  | -1.301614 |
| 1 | 0 | 0.300758  | 1.961815  | -1.146685 |
| 1 | 0 | -3.013199 | 2.056893  | 0.486621  |
| 1 | 0 | -1.272336 | 2.574547  | 0.816675  |
| 1 | 0 | -2.703166 | -2.294067 | -1.365588 |
| 1 | 0 | -0.962490 | -1.697968 | -1.206753 |
| 1 | 0 | 4.509289  | -1.365562 | -0.223674 |
| 1 | 0 | 4.744284  | 0.031619  | 0.823552  |
| 1 | 0 | 4.693530  | 0.246389  | -0.927185 |
| 1 | 0 | -4.487900 | -1.207390 | -0.327727 |
| 1 | 0 | -4.328494 | 0.539988  | -0.514557 |
| 1 | 0 | -4.112805 | -0.190685 | 1.075982  |
| 1 | 0 | -1.765727 | -0.084658 | 2.044472  |

**TS i4-p6**

|   |   |           |           |           |
|---|---|-----------|-----------|-----------|
| 6 | 0 | 0.726515  | 0.007442  | 1.344211  |
| 6 | 0 | 2.058677  | -0.356661 | 1.171584  |
| 6 | 0 | 2.710129  | -0.154326 | -0.047478 |
| 6 | 0 | 1.972248  | 0.417399  | -1.091346 |
| 6 | 0 | 0.643098  | 0.783572  | -0.921340 |
| 6 | 0 | -0.006389 | 0.596374  | 0.307201  |
| 6 | 0 | -2.033521 | 2.023757  | -0.120464 |
| 6 | 0 | -1.412107 | 0.996987  | 0.539506  |
| 6 | 0 | 4.162770  | -0.520398 | -0.231376 |
| 1 | 0 | 0.245134  | -0.167705 | 2.300951  |
| 1 | 0 | 2.598758  | -0.808084 | 1.997953  |
| 1 | 0 | 2.446073  | 0.571413  | -2.056038 |

|   |   |           |           |           |
|---|---|-----------|-----------|-----------|
| 1 | 0 | 0.098632  | 1.203477  | -1.759299 |
| 1 | 0 | -3.004584 | 2.381823  | 0.198044  |
| 1 | 0 | -1.612801 | 2.476781  | -1.009775 |
| 1 | 0 | -1.798130 | 0.729411  | 1.519027  |
| 1 | 0 | 4.352736  | -0.909510 | -1.234977 |
| 1 | 0 | 4.477550  | -1.277575 | 0.490156  |
| 1 | 0 | 4.809719  | 0.353217  | -0.093745 |
| 6 | 0 | -2.513738 | -0.891466 | -0.160057 |
| 6 | 0 | -1.775420 | -1.871971 | -0.625252 |
| 6 | 0 | -3.967811 | -0.697720 | 0.019198  |
| 1 | 0 | -2.234618 | -2.799157 | -0.979731 |
| 1 | 0 | -0.693179 | -1.816369 | -0.680637 |
| 1 | 0 | -4.327177 | 0.154539  | -0.565541 |
| 1 | 0 | -4.220423 | -0.500785 | 1.066824  |
| 1 | 0 | -4.524399 | -1.589403 | -0.299542 |

**TS i5-p5**

|   |   |           |           |           |
|---|---|-----------|-----------|-----------|
| 6 | 0 | -2.464236 | -0.495686 | -0.007144 |
| 6 | 0 | -2.532397 | 0.885165  | 0.243326  |
| 6 | 0 | -1.386239 | 1.685968  | 0.242221  |
| 6 | 0 | -0.146547 | 1.105553  | 0.038692  |
| 6 | 0 | -0.040273 | -0.308188 | -0.065764 |
| 6 | 0 | -1.216460 | -1.081105 | -0.198434 |
| 6 | 0 | 1.196246  | 1.772370  | -0.181991 |
| 6 | 0 | 2.137491  | 0.625179  | -0.567517 |
| 6 | 0 | 1.350795  | -0.685365 | -0.489358 |
| 6 | 0 | 2.491096  | -0.405345 | 0.467294  |
| 6 | 0 | -3.725232 | -1.326228 | -0.053095 |
| 6 | 0 | 3.781142  | -1.184681 | 0.340674  |
| 1 | 0 | -3.503421 | 1.347783  | 0.388625  |
| 1 | 0 | -1.481768 | 2.761672  | 0.352614  |
| 1 | 0 | -1.138943 | -2.146478 | -0.390640 |
| 1 | 0 | 1.546265  | 2.307072  | 0.709368  |
| 1 | 0 | 1.130274  | 2.511965  | -0.986980 |
| 1 | 0 | 2.842409  | 0.789773  | -1.375148 |
| 1 | 0 | 1.474236  | -1.472050 | -1.225667 |
| 1 | 0 | 2.184754  | -0.189210 | 1.488136  |
| 1 | 0 | -3.553570 | -2.281277 | -0.554149 |
| 1 | 0 | -4.528083 | -0.805986 | -0.582189 |
| 1 | 0 | -4.088606 | -1.544769 | 0.956929  |
| 1 | 0 | 3.715732  | -2.144324 | 0.862320  |
| 1 | 0 | 4.620993  | -0.627164 | 0.767210  |
| 1 | 0 | 4.018769  | -1.390910 | -0.707316 |
| 1 | 0 | 0.088639  | -0.641920 | 1.683450  |

**TS i0-i6**

|   |   |           |           |           |
|---|---|-----------|-----------|-----------|
| 6 | 0 | 2.887098  | 1.019809  | -0.140511 |
| 6 | 0 | 3.112376  | -0.346061 | 0.068977  |
| 6 | 0 | 2.010621  | -1.206486 | 0.129972  |
| 6 | 0 | 0.703657  | -0.722311 | -0.009104 |
| 6 | 0 | 0.547401  | 0.629390  | -0.209177 |
| 6 | 0 | 1.589642  | 1.526436  | -0.282048 |
| 6 | 0 | 4.517181  | -0.873536 | 0.249794  |
| 1 | 0 | 3.732921  | 1.699496  | -0.196776 |
| 1 | 0 | 2.170750  | -2.269724 | 0.285192  |
| 1 | 0 | -0.145281 | -1.396472 | 0.034870  |
| 1 | 0 | 1.429404  | 2.586917  | -0.447564 |
| 1 | 0 | 4.575227  | -1.939372 | 0.018410  |
| 1 | 0 | 4.858567  | -0.742722 | 1.282482  |
| 1 | 0 | 5.226376  | -0.349690 | -0.396029 |
| 6 | 0 | -1.948829 | 1.426706  | -0.600247 |
| 6 | 0 | -2.733712 | 0.504157  | -0.000014 |
| 6 | 0 | -3.187556 | -0.659401 | -0.757182 |
| 6 | 0 | -3.943910 | -1.662162 | -0.289695 |
| 6 | 0 | -3.124484 | 0.633209  | 1.449386  |
| 1 | 0 | -1.701825 | 1.354884  | -1.652611 |
| 1 | 0 | -1.636585 | 2.325565  | -0.083619 |
| 1 | 0 | -2.867903 | -0.690797 | -1.796530 |
| 1 | 0 | -4.235655 | -2.487240 | -0.928426 |
| 1 | 0 | -4.296907 | -1.693775 | 0.734726  |
| 1 | 0 | -4.213184 | 0.644669  | 1.565470  |
| 1 | 0 | -2.724816 | 1.550807  | 1.882846  |
| 1 | 0 | -2.748000 | -0.211042 | 2.036651  |

**TS i0-i9**

|   |   |           |           |           |
|---|---|-----------|-----------|-----------|
| 6 | 0 | -0.841756 | -1.321812 | -0.177332 |
| 6 | 0 | -2.229056 | -1.145964 | -0.129626 |
| 6 | 0 | -2.792701 | 0.126113  | 0.013493  |
| 6 | 0 | -1.935118 | 1.228034  | 0.113164  |
| 6 | 0 | -0.545999 | 1.071471  | 0.066255  |
| 6 | 0 | -0.041780 | -0.204202 | -0.072947 |
| 6 | 0 | -4.292204 | 0.312522  | 0.030093  |
| 1 | 0 | -0.417528 | -2.313893 | -0.290828 |
| 1 | 0 | -2.878994 | -2.013310 | -0.204613 |
| 1 | 0 | -2.354742 | 2.223893  | 0.226747  |
| 1 | 0 | 0.109108  | 1.934074  | 0.133627  |
| 1 | 0 | -4.802862 | -0.592991 | 0.365512  |
| 1 | 0 | -4.671705 | 0.551520  | -0.969516 |
| 1 | 0 | -4.585455 | 1.130192  | 0.693156  |
| 6 | 0 | 2.334179  | -1.739134 | -0.610184 |
| 6 | 0 | 2.248203  | -0.517075 | 0.012059  |
| 6 | 0 | 2.568645  | 0.686132  | -0.781577 |

|   |   |          |           |           |
|---|---|----------|-----------|-----------|
| 6 | 0 | 2.968346 | 1.865133  | -0.298713 |
| 6 | 0 | 2.376052 | -0.439321 | 1.521422  |
| 1 | 0 | 2.405489 | -1.816163 | -1.688904 |
| 1 | 0 | 2.266806 | -2.663473 | -0.048792 |
| 1 | 0 | 2.483403 | 0.561240  | -1.858367 |
| 1 | 0 | 3.209267 | 2.686287  | -0.963528 |
| 1 | 0 | 3.080171 | 2.051437  | 0.763283  |
| 1 | 0 | 1.828820 | 0.406747  | 1.938500  |
| 1 | 0 | 3.430199 | -0.327448 | 1.798756  |
| 1 | 0 | 1.997164 | -1.349493 | 1.988333  |

**TS i6-i7**

|   |   |           |           |           |
|---|---|-----------|-----------|-----------|
| 6 | 0 | -1.121907 | -1.293201 | -0.546656 |
| 6 | 0 | -2.456559 | -1.047561 | -0.221579 |
| 6 | 0 | -2.897832 | 0.238661  | 0.089248  |
| 6 | 0 | -1.955454 | 1.275304  | 0.063447  |
| 6 | 0 | -0.626731 | 1.031103  | -0.259752 |
| 6 | 0 | -0.184973 | -0.260762 | -0.572385 |
| 6 | 0 | 1.268077  | -0.511977 | -0.930613 |
| 6 | 0 | 2.249250  | -0.296938 | 0.198726  |
| 6 | 0 | 3.641730  | 0.047967  | -0.153948 |
| 6 | 0 | 4.181935  | 1.263503  | -0.084713 |
| 6 | 0 | -4.339443 | 0.513265  | 0.445186  |
| 6 | 0 | 1.992574  | -0.925015 | 1.535100  |
| 1 | 0 | -0.808828 | -2.304548 | -0.787162 |
| 1 | 0 | -3.163200 | -1.871536 | -0.212144 |
| 1 | 0 | -2.270272 | 2.288008  | 0.297258  |
| 1 | 0 | 0.082664  | 1.852567  | -0.271401 |
| 1 | 0 | 1.553391  | 0.132810  | -1.768838 |
| 1 | 0 | 1.360210  | -1.545405 | -1.308962 |
| 1 | 0 | 4.277020  | -0.776607 | -0.499442 |
| 1 | 0 | 5.216082  | 1.440154  | -0.360591 |
| 1 | 0 | 3.607584  | 2.120960  | 0.251587  |
| 1 | 0 | -4.432245 | 0.879955  | 1.472569  |
| 1 | 0 | -4.948796 | -0.388468 | 0.357717  |
| 1 | 0 | -4.772856 | 1.275193  | -0.209916 |
| 1 | 0 | 2.554003  | -0.419446 | 2.325355  |
| 1 | 0 | 2.310348  | -1.982549 | 1.549460  |
| 1 | 0 | 0.930891  | -0.907184 | 1.792149  |

**TS i6-i9**

|   |   |           |           |           |
|---|---|-----------|-----------|-----------|
| 6 | 0 | -0.360953 | 0.905462  | 0.801547  |
| 6 | 0 | -1.676785 | 1.115910  | 0.490956  |
| 6 | 0 | -2.480148 | 0.123615  | -0.120347 |
| 6 | 0 | -1.875163 | -1.132420 | -0.378441 |
| 6 | 0 | -0.566517 | -1.390959 | -0.080341 |

|   |   |           |           |           |
|---|---|-----------|-----------|-----------|
| 6 | 0 | 0.313024  | -0.368632 | 0.507887  |
| 6 | 0 | 1.465359  | -0.812567 | 1.435751  |
| 6 | 0 | 1.853593  | -0.334350 | 0.079677  |
| 6 | 0 | 2.542483  | 0.990129  | -0.041074 |
| 6 | 0 | 2.245804  | 1.934045  | -0.930791 |
| 6 | 0 | -3.930111 | 0.365703  | -0.437461 |
| 6 | 0 | 2.344371  | -1.350025 | -0.942713 |
| 1 | 0 | 0.215952  | 1.694412  | 1.267095  |
| 1 | 0 | -2.122664 | 2.078518  | 0.725145  |
| 1 | 0 | -2.477669 | -1.922273 | -0.818752 |
| 1 | 0 | -0.163591 | -2.377191 | -0.274673 |
| 1 | 0 | 1.532314  | -1.874156 | 1.652060  |
| 1 | 0 | 1.656458  | -0.167139 | 2.287406  |
| 1 | 0 | 3.378174  | 1.148238  | 0.641230  |
| 1 | 0 | 2.819069  | 2.852442  | -0.991909 |
| 1 | 0 | 1.414222  | 1.826781  | -1.619542 |
| 1 | 0 | -4.590580 | -0.106715 | 0.301649  |
| 1 | 0 | -4.202134 | -0.046062 | -1.414558 |
| 1 | 0 | -4.164156 | 1.432902  | -0.446489 |
| 1 | 0 | 3.435574  | -1.425373 | -0.890194 |
| 1 | 0 | 2.081499  | -1.042545 | -1.958136 |
| 1 | 0 | 1.937794  | -2.347297 | -0.768222 |

**TS i6-i10**

|   |   |           |           |           |
|---|---|-----------|-----------|-----------|
| 6 | 0 | 2.523344  | -0.140736 | 0.149485  |
| 6 | 0 | 2.132795  | 1.208055  | 0.165326  |
| 6 | 0 | 0.854273  | 1.594592  | -0.258339 |
| 6 | 0 | -0.054025 | 0.664133  | -0.728852 |
| 6 | 0 | 0.315532  | -0.718047 | -0.744247 |
| 6 | 0 | 1.622771  | -1.083766 | -0.331743 |
| 6 | 0 | -1.527047 | 0.931532  | -0.892414 |
| 6 | 0 | -2.232335 | 0.012329  | 0.147678  |
| 6 | 0 | -1.375950 | -1.133744 | 0.542560  |
| 6 | 0 | -2.570113 | -1.411237 | -0.290015 |
| 6 | 0 | 3.899900  | -0.542342 | 0.624803  |
| 6 | 0 | -3.123335 | 0.712787  | 1.154941  |
| 1 | 0 | 2.827282  | 1.961724  | 0.522809  |
| 1 | 0 | 0.563016  | 2.638421  | -0.190083 |
| 1 | 0 | -0.195399 | -1.394905 | -1.421721 |
| 1 | 0 | 1.925557  | -2.123535 | -0.404958 |
| 1 | 0 | -1.876420 | 0.703362  | -1.906044 |
| 1 | 0 | -1.763046 | 1.980881  | -0.700062 |
| 1 | 0 | -1.133682 | -1.509966 | 1.527863  |
| 1 | 0 | -2.441729 | -1.664888 | -1.341670 |
| 1 | 0 | -3.422757 | -1.907927 | 0.169816  |
| 1 | 0 | 4.009314  | -0.376883 | 1.701766  |

|   |   |           |           |          |
|---|---|-----------|-----------|----------|
| 1 | 0 | 4.679913  | 0.041710  | 0.127316 |
| 1 | 0 | 4.095284  | -1.598843 | 0.430291 |
| 1 | 0 | -3.540965 | 0.004572  | 1.875673 |
| 1 | 0 | -3.960142 | 1.217392  | 0.658919 |
| 1 | 0 | -2.561086 | 1.467551  | 1.714981 |

**TS i6-p7**

|   |   |           |           |           |
|---|---|-----------|-----------|-----------|
| 6 | 0 | 2.519763  | 1.174045  | 0.192977  |
| 6 | 0 | 3.044234  | -0.107932 | 0.006874  |
| 6 | 0 | 2.148139  | -1.136244 | -0.307071 |
| 6 | 0 | 0.783044  | -0.900895 | -0.412793 |
| 6 | 0 | 0.248477  | 0.382955  | -0.203994 |
| 6 | 0 | 1.155802  | 1.416814  | 0.079229  |
| 6 | 0 | -1.179233 | 0.705297  | -0.321840 |
| 6 | 0 | -2.269892 | -0.032822 | -0.003350 |
| 6 | 0 | -3.587525 | 0.540895  | -0.287847 |
| 6 | 0 | -4.774576 | -0.047222 | -0.095687 |
| 6 | 0 | 4.524566  | -0.378552 | 0.119524  |
| 6 | 0 | -2.218008 | -1.389970 | 0.651421  |
| 1 | 0 | 3.189407  | 1.995809  | 0.426127  |
| 1 | 0 | 2.527348  | -2.138472 | -0.482782 |
| 1 | 0 | 0.128974  | -1.715498 | -0.695976 |
| 1 | 0 | 0.779328  | 2.424208  | 0.224560  |
| 1 | 0 | -1.374068 | 1.704473  | -0.707075 |
| 1 | 0 | -3.572758 | 1.542648  | -0.712214 |
| 1 | 0 | -5.695572 | 0.463314  | -0.350457 |
| 1 | 0 | -4.872898 | -1.046862 | 0.311052  |
| 1 | 0 | 4.936598  | -0.734520 | -0.830217 |
| 1 | 0 | 4.731420  | -1.148163 | 0.869632  |
| 1 | 0 | 5.073020  | 0.521500  | 0.404100  |
| 1 | 0 | -1.239218 | -1.595312 | 1.081483  |
| 1 | 0 | -2.455002 | -2.190396 | -0.058602 |
| 1 | 0 | -2.957633 | -1.447734 | 1.454632  |
| 1 | 0 | -1.567683 | 2.006794  | 2.561081  |

**TS i7-i8**

|   |   |           |           |           |
|---|---|-----------|-----------|-----------|
| 6 | 0 | -0.137329 | -0.758273 | 0.257117  |
| 6 | 0 | 0.280326  | 0.523900  | 0.745839  |
| 6 | 0 | -2.550217 | 0.014698  | -0.056610 |
| 6 | 0 | -1.601938 | -1.116056 | 0.305872  |
| 6 | 0 | 0.795333  | -1.554673 | -0.383174 |
| 6 | 0 | 2.138464  | -1.170294 | -0.489297 |
| 6 | 0 | 2.588631  | 0.038605  | 0.071278  |
| 6 | 0 | 1.667878  | 0.846631  | 0.720486  |
| 6 | 0 | -4.009050 | -0.276265 | 0.167632  |
| 6 | 0 | 4.045287  | 0.426620  | -0.022457 |

|   |   |           |           |           |
|---|---|-----------|-----------|-----------|
| 6 | 0 | -0.736514 | 1.594432  | -0.752441 |
| 6 | 0 | -2.123800 | 1.216270  | -0.493914 |
| 1 | 0 | -0.336084 | 1.012523  | 1.492783  |
| 1 | 0 | -1.873065 | -1.455207 | 1.317447  |
| 1 | 0 | -1.790751 | -1.979405 | -0.345860 |
| 1 | 0 | 0.478605  | -2.499456 | -0.815372 |
| 1 | 0 | 2.844039  | -1.823698 | -0.992022 |
| 1 | 0 | 1.998613  | 1.766835  | 1.191667  |
| 1 | 0 | -4.633359 | 0.587013  | -0.071367 |
| 1 | 0 | -4.203524 | -0.564222 | 1.208065  |
| 1 | 0 | -4.344414 | -1.115655 | -0.454371 |
| 1 | 0 | 4.322329  | 0.670351  | -1.053586 |
| 1 | 0 | 4.696613  | -0.390002 | 0.302565  |
| 1 | 0 | 4.264901  | 1.299881  | 0.595149  |
| 1 | 0 | -0.202352 | 1.124461  | -1.570546 |
| 1 | 0 | -0.492537 | 2.648532  | -0.635897 |
| 1 | 0 | -2.871437 | 2.004494  | -0.590630 |

**TS i7-p8**

|   |   |           |           |           |
|---|---|-----------|-----------|-----------|
| 6 | 0 | 0.992824  | -1.337663 | -0.418966 |
| 6 | 0 | 2.374126  | -1.192384 | -0.431913 |
| 6 | 0 | 2.982508  | -0.021921 | 0.033897  |
| 6 | 0 | 2.151765  | 0.988774  | 0.527424  |
| 6 | 0 | 0.768107  | 0.850200  | 0.536915  |
| 6 | 0 | 0.152849  | -0.312178 | 0.045421  |
| 6 | 0 | -1.302685 | -0.530521 | 0.027697  |
| 6 | 0 | -2.297017 | 0.356027  | -0.244653 |
| 6 | 0 | -3.703633 | -0.075099 | -0.239645 |
| 6 | 0 | -4.250758 | -1.007361 | 0.547212  |
| 6 | 0 | 4.481295  | 0.147758  | -0.005159 |
| 1 | 0 | 0.549373  | -2.259895 | -0.780461 |
| 1 | 0 | 2.991708  | -2.003983 | -0.803817 |
| 1 | 0 | 2.595594  | 1.895944  | 0.925689  |
| 1 | 0 | 0.162881  | 1.637253  | 0.968268  |
| 1 | 0 | -1.597950 | -1.572961 | 0.108690  |
| 1 | 0 | -4.352124 | 0.456038  | -0.934952 |
| 1 | 0 | -5.299641 | -1.266185 | 0.460600  |
| 1 | 0 | -3.677385 | -1.522692 | 1.309619  |
| 1 | 0 | 4.994510  | -0.811088 | 0.099276  |
| 1 | 0 | 4.829431  | 0.807416  | 0.793092  |
| 1 | 0 | 4.802264  | 0.587895  | -0.956039 |
| 1 | 0 | -1.581670 | -0.519624 | 2.273245  |
| 6 | 0 | -2.071007 | 1.803335  | -0.605941 |
| 1 | 0 | -2.242574 | 2.459819  | 0.255587  |
| 1 | 0 | -2.782719 | 2.110587  | -1.378165 |
| 1 | 0 | -1.061947 | 1.987664  | -0.974361 |

**TS i8-p9**

|   |   |           |           |           |
|---|---|-----------|-----------|-----------|
| 6 | 0 | -0.121755 | -0.711120 | -0.028181 |
| 6 | 0 | 0.236128  | 0.653057  | 0.082120  |
| 6 | 0 | -0.800304 | 1.741489  | -0.147362 |
| 6 | 0 | -2.218754 | 1.258433  | -0.073137 |
| 6 | 0 | -2.581588 | -0.023176 | -0.014410 |
| 6 | 0 | -1.569724 | -1.141769 | -0.016249 |
| 6 | 0 | 0.892912  | -1.667736 | -0.061770 |
| 6 | 0 | 2.234088  | -1.306564 | -0.039460 |
| 6 | 0 | 2.613345  | 0.046409  | -0.002481 |
| 6 | 0 | 1.609833  | 1.000547  | 0.028469  |
| 6 | 0 | -4.022684 | -0.452445 | 0.052193  |
| 6 | 0 | 4.072119  | 0.435127  | 0.000246  |
| 1 | 0 | 0.033112  | 0.685280  | 1.900208  |
| 1 | 0 | -0.619569 | 2.183255  | -1.138730 |
| 1 | 0 | -0.645259 | 2.557378  | 0.567087  |
| 1 | 0 | -2.988764 | 2.026069  | -0.082198 |
| 1 | 0 | -1.746343 | -1.779027 | 0.863183  |
| 1 | 0 | -1.762897 | -1.795854 | -0.878831 |
| 1 | 0 | 0.625485  | -2.719382 | -0.110169 |
| 1 | 0 | 2.998257  | -2.076841 | -0.068886 |
| 1 | 0 | 1.874130  | 2.054056  | 0.044507  |
| 1 | 0 | -4.220141 | -1.026444 | 0.965352  |
| 1 | 0 | -4.279237 | -1.105748 | -0.790399 |
| 1 | 0 | -4.699107 | 0.404227  | 0.036404  |
| 1 | 0 | 4.196573  | 1.514794  | -0.103319 |
| 1 | 0 | 4.614761  | -0.047476 | -0.817972 |
| 1 | 0 | 4.557312  | 0.132194  | 0.933897  |

**TS i9-p10**

|   |   |           |           |           |
|---|---|-----------|-----------|-----------|
| 6 | 0 | 0.359234  | -0.897337 | 0.492241  |
| 6 | 0 | 1.739732  | -1.056967 | 0.510453  |
| 6 | 0 | 2.594192  | -0.065975 | 0.014845  |
| 6 | 0 | 2.007759  | 1.085462  | -0.512782 |
| 6 | 0 | 0.624599  | 1.246770  | -0.534889 |
| 6 | 0 | -0.232485 | 0.266043  | -0.020295 |
| 6 | 0 | -2.230047 | 1.750571  | 0.017883  |
| 6 | 0 | -1.723274 | 0.465094  | -0.072527 |
| 6 | 0 | -2.548729 | -0.531554 | -0.805283 |
| 6 | 0 | -2.113848 | -1.554818 | -1.541435 |
| 6 | 0 | 4.093307  | -0.232032 | 0.067415  |
| 6 | 0 | -2.336805 | -0.263432 | 1.975951  |
| 1 | 0 | -0.265560 | -1.687748 | 0.887669  |
| 1 | 0 | 2.161646  | -1.969666 | 0.920082  |
| 1 | 0 | 2.638832  | 1.866977  | -0.924411 |
| 1 | 0 | 0.201686  | 2.139424  | -0.979992 |



|   |   |           |           |           |
|---|---|-----------|-----------|-----------|
| 1 | 0 | -3.271921 | 1.950517  | -0.202203 |
| 1 | 0 | -1.642194 | 2.563504  | 0.424087  |
| 1 | 0 | -3.619778 | -0.351342 | -0.744023 |
| 1 | 0 | -2.815132 | -2.197161 | -2.061285 |
| 1 | 0 | -1.060519 | -1.778080 | -1.659395 |
| 1 | 0 | 4.590680  | 0.403194  | -0.668776 |
| 1 | 0 | 4.387699  | -1.267073 | -0.124097 |
| 1 | 0 | 4.484856  | 0.039922  | 1.053941  |
| 1 | 0 | -3.344990 | 0.126175  | 2.050664  |
| 1 | 0 | -1.590867 | 0.231002  | 2.586143  |
| 1 | 0 | -2.256249 | -1.340592 | 1.892136  |

**TS i9-p12**

|   |   |           |           |           |
|---|---|-----------|-----------|-----------|
| 6 | 0 | 0.502481  | -1.136282 | -0.668084 |
| 6 | 0 | 1.877794  | -0.944442 | -0.785808 |
| 6 | 0 | 2.548281  | 0.000463  | -0.009359 |
| 6 | 0 | 1.783903  | 0.759024  | 0.886171  |
| 6 | 0 | 0.413946  | 0.570562  | 1.006281  |
| 6 | 0 | -0.262040 | -0.393302 | 0.239533  |
| 6 | 0 | -2.325088 | -0.450332 | 1.620453  |
| 6 | 0 | -1.729239 | -0.629343 | 0.397362  |
| 6 | 0 | 4.041355  | 0.193236  | -0.113879 |
| 1 | 0 | 0.029468  | -1.884546 | -1.291152 |
| 1 | 0 | 2.435907  | -1.544556 | -1.497707 |
| 1 | 0 | 2.269673  | 1.516844  | 1.493480  |
| 1 | 0 | -0.144500 | 1.198475  | 1.690063  |
| 1 | 0 | -3.362619 | -0.723342 | 1.773908  |
| 1 | 0 | -1.813375 | 0.017475  | 2.450888  |
| 1 | 0 | 4.436185  | -0.241776 | -1.034386 |
| 1 | 0 | 4.559951  | -0.283680 | 0.725135  |
| 1 | 0 | 4.309304  | 1.253220  | -0.098799 |
| 6 | 0 | -2.501597 | 1.282367  | -0.637753 |
| 6 | 0 | -1.710953 | 2.228490  | -1.084034 |
| 1 | 0 | -3.581916 | 1.210622  | -0.599631 |
| 1 | 0 | -2.107997 | 3.142471  | -1.532050 |
| 1 | 0 | -0.627737 | 2.148893  | -1.036075 |
| 6 | 0 | -2.410949 | -1.550649 | -0.601180 |
| 1 | 0 | -3.492969 | -1.526600 | -0.461434 |
| 1 | 0 | -2.082913 | -2.584694 | -0.445955 |
| 1 | 0 | -2.193815 | -1.277554 | -1.634504 |

**TS i10-p11**

|   |   |           |           |           |
|---|---|-----------|-----------|-----------|
| 6 | 0 | -2.491260 | -0.248676 | -0.139705 |
| 6 | 0 | -2.336433 | 1.135700  | 0.042282  |
| 6 | 0 | -1.072643 | 1.718171  | 0.180981  |
| 6 | 0 | 0.053272  | 0.913769  | 0.192301  |

|   |   |           |           |           |
|---|---|-----------|-----------|-----------|
| 6 | 0 | -0.091639 | -0.499706 | 0.161831  |
| 6 | 0 | -1.359492 | -1.058405 | -0.117234 |
| 6 | 0 | 1.512699  | 1.311083  | 0.143305  |
| 6 | 0 | 2.279404  | -0.007548 | -0.072219 |
| 6 | 0 | 1.251861  | -1.140076 | -0.033795 |
| 6 | 0 | 2.272210  | -0.979165 | 1.075218  |
| 6 | 0 | -3.865298 | -0.843469 | -0.339895 |
| 6 | 0 | 3.437748  | 0.001107  | -1.043220 |
| 1 | 0 | -3.215269 | 1.772265  | 0.021138  |
| 1 | 0 | -0.981020 | 2.798740  | 0.230476  |
| 1 | 0 | -1.454680 | -2.131029 | -0.252924 |
| 1 | 0 | 1.839196  | 1.826177  | 1.054656  |
| 1 | 0 | 1.693518  | 2.000537  | -0.689238 |
| 1 | 0 | 1.328867  | -1.998327 | -0.692097 |
| 1 | 0 | 1.905744  | -0.660874 | 2.045342  |
| 1 | 0 | 3.077833  | -1.705094 | 1.109685  |
| 1 | 0 | -3.806091 | -1.840644 | -0.781490 |
| 1 | 0 | -4.480390 | -0.219669 | -0.993807 |
| 1 | 0 | -4.395233 | -0.937146 | 0.614230  |
| 1 | 0 | 3.856548  | -1.001093 | -1.168036 |
| 1 | 0 | 4.243360  | 0.653467  | -0.688717 |
| 1 | 0 | 3.125697  | 0.360379  | -2.029396 |
| 1 | 0 | -0.280658 | -0.734403 | 1.921081  |
